# Supplementary material for: Comprehensive Analysis of the INDETERMINATE DOMAIN (IDD) Gene Family and Their Response to Abiotic Stress in Zea mays
Source: MDPI journal article supplement (doi:10.3390/ijms24076185), 2023-03-24
Supplement: s1 [file s1]

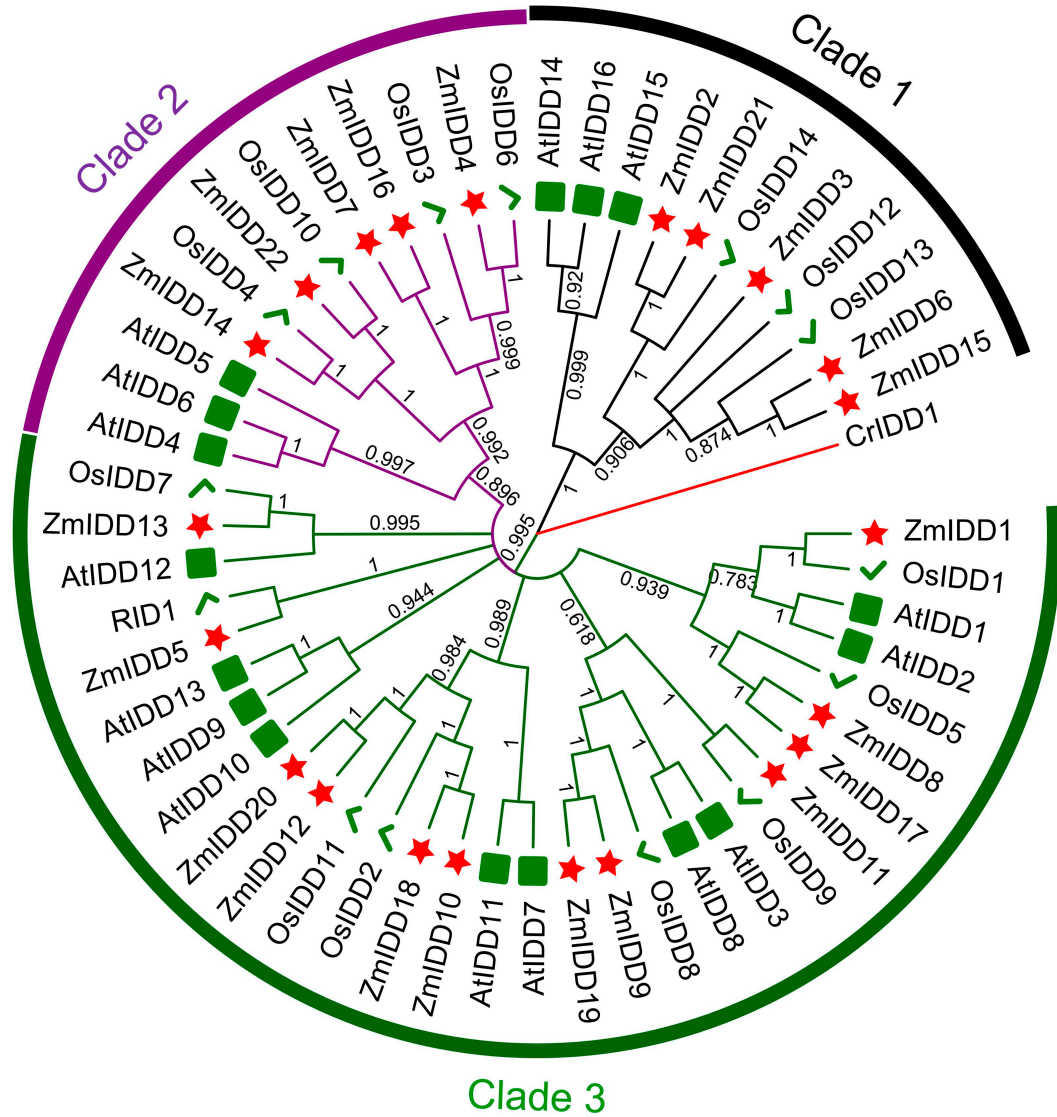

**Figure S1.** Phylogenetic tree of full-length ZmIDD, AtIDD and OsIDD proteins using the Minimum Evolution method. The optimal tree with the sum of branch length = 3.31299193 is shown. The analysis involved 54 amino acid sequences. All positions containing gaps and missing data were eliminated. There were a total of 94 positions in the final dataset. The different colored arcs indicate subfamilies of the IDD proteins. Different colour shapes represent IDs from maize (☆), rice (√), and Arabidopsis (□). IDD in *Chlamydomonas reinhardtii* was selected as outgroup.

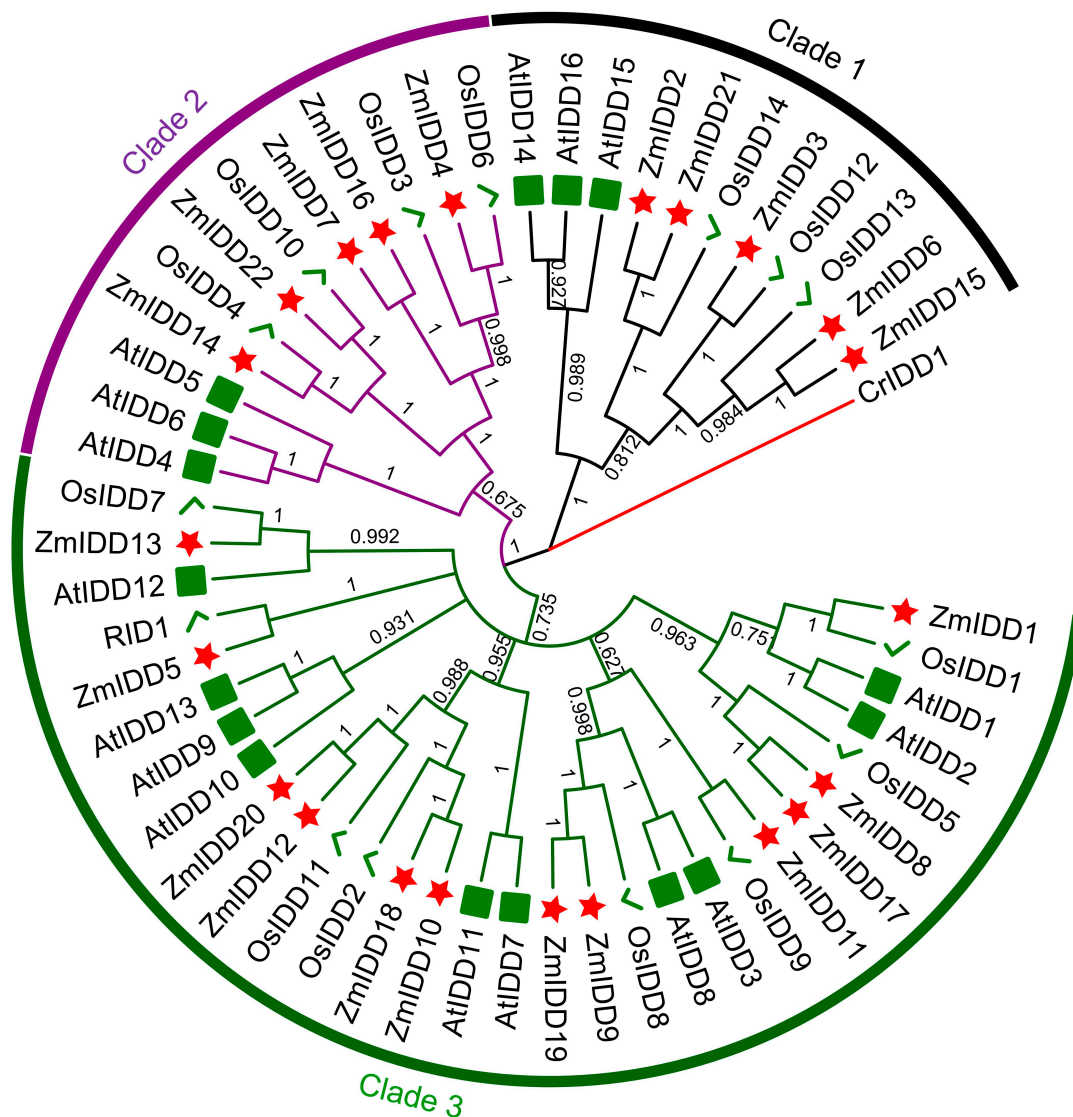

**Figure S2.** Phylogenetic tree of full-length ZmIDD, AtIDD and OsIDD proteins using the Neighbor-Joining method. The optimal tree with the sum of branch length = 3.31299193 is shown. The analysis involved 54 amino acid sequences. All positions containing gaps and missing data were eliminated. There were a total of 94 positions in the final dataset. The different colored arcs indicate subfamilies of the IDD proteins. Different colour shapes represent IDDs from maize (☆), rice (√), and Arabidopsis (□). IDD in *Chlamydomonas reinhardtii* was selected as outgroup.

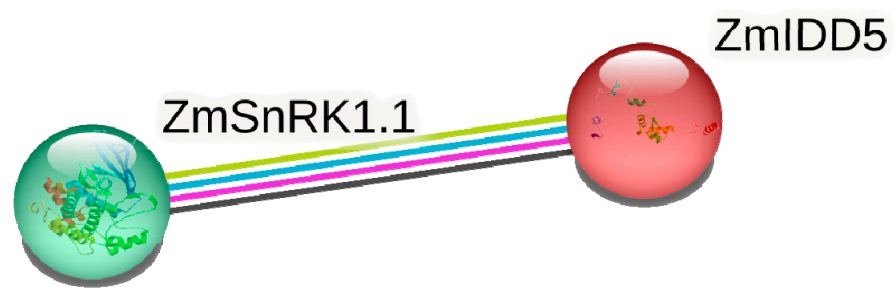

**Figure S3.** Interaction networks between ZmSnRK and ZmIDD proteins.
