# Supplementary material for: Comprehensive Analysis of the INDETERMINATE DOMAIN (IDD) Gene Family and Their Response to Abiotic Stress in Zea mays
Source: Int J Mol Sci. 2023 Mar 24;24(7):6185. doi: 10.3390/ijms24076185 (PMC10094743; doi:10.3390/ijms24076185)
Supplement: Supplementary file 1 [file ijms-24-06185-s001.zip › Feng et al Table S1-S13.xlsx]

## Sheet: S1
Table S1. Characteristics of the IDD genes in Zea mays.
Gene Name	Gene ID	UniProtKB	Chr.	Protein			Position of C2H2 domain
				Amino acids	MW(kDa)	pI	From	To
ZmIDD1	Zm00001d028139	B6SS63	1	539	56.0598	8.93	57	79
ZmIDD2	Zm00001d028361	A0A1D6JVG3	1	421	43.7889	9.55	78	100
ZmIDD3	Zm00001d031759	A0A1D6KL68	1	472	50.1586	8.5	69	91
ZmIDD4	Zm00001d031992	A0A1D6KMW8	1	605	63.8161	9.49	130	152
ZmIDD5	Zm00001d032922	O65215	1	436	46.7463	8.55	96	118
ZmIDD6	Zm00001d005871	A0A1D6ERC8	2	441	47.229	9.38	67	89
ZmIDD7	Zm00001d002654	A0A1D6E319	2	588	58.7428	8.5	54	76
ZmIDD8	Zm00001d006682	A0A1D6EZM1	2	727	78.653	5.95	60	82
ZmIDD9	Zm00001d039254	A0A1D6MER1	3	354	37.9828	8.99	26	48
ZmIDD10	Zm00001d039467	A0A1D6MHJ0	3	497	52.1749	8.68	79	101
ZmIDD11	Zm00001d042202	C0PED3	3	525	55.2985	8.01	99	121
ZmIDD12	Zm00001d044261	A0A1D6NJZ4	3	480	51.2582	8.25	79	100
ZmIDD13	Zm00001d016632	A0A1D6H9C8	5	508	55.1382	7.81	72	94
ZmIDD14	Zm00001d017560	A0A1D6HFN7	5	582	60.9748	8.75	94	116
ZmIDD15	Zm00001d020683	A0A1D6I5M2	7	444	47.6374	8.81	66	88
ZmIDD16	Zm00001d021403	A0A1D6IAP1	7	484	50.616	8.89	23	45
ZmIDD17	Zm00001d021932	A0A1D6IHX1	7	815	90.0159	6.79	62	84
ZmIDD18	Zm00001d008842	A0A1D6FG97	8	467	49.5409	8.29	75	97
ZmIDD19	Zm00001d009030	A0A1D6FHC4	8	437	46.2091	9.28	74	96
ZmIDD20	Zm00001d011223	A0A1D6FY24	8	468	50.4524	8.02	83	105
ZmIDD21	Zm00001d047976	K7VNU9	9	419	43.5906	9.86	82	104
ZmIDD22	Zm00001d026113	A0A1D6JCM3	10	599	62.3891	8.9	85	107

## Sheet: S2
Table S2. The list of 22 IDD genes identified in Zea mays.
Gene Name	Gene ID	Subfamily	Exon Number	Sequence Type	Sequences
ZmIDD1	Zm00001d028139	Ⅲ	4	CDS	ATGGAGGTGGAGGCGACGCCCACGACGGCCGTGTCATCTTCCGGCGTGGCCGCGCAGCTGCCGCCGCCCGGCCCGCCCGCCAAGAAAAAGCGTGCCCTCCCCGGCATGCCAGATCCTGACGCGGAGGTGATCGCGCTGTCGCCCAAGACGCTGCTGGCGACGAACCGGTTCGTGTGCGAGATCTGCAACAAGGGGTTCCAGCGGGACCAGAACCTGCAGCTCCACCGGCGGGGCCACAACCTGCCGTGGAAGCTGCGGCAGCGGAGCGGCAAGGAGGTCCGGAAGCGGGTGTACGTGTGCCCGGAGCCCAGCTGCGTGCACCACGACCCGTCGCGCGCGCTCGGCGACCTCACCGGGATCAAGAAGCACTTCTGCCGCAAGCACGGCGAGAAGAAGTGG…
				Protein	MEVEATPTTAVSSSGVAAQLPPPGPPAKKKRALPGMPDPDAEVIALSPKTLLATNRFVCEICNKGFQRDQNLQLHRRGHNLPWKLRQRSGKEVRKRVYVCPEPSCVHHDPSRALGDLTGIKKHFCRKHGEKKWKCDKCSKKYAVQSDWKAHVKTCGSREYRCDCGTLFSRRDSFITHRAFCDALAEESAKARAEAPSAEDGSSAAAVVPPPAPPPAPAPLRQQPPPPAPHHAEPRNETDTNATEAVQFAPPPPPPPPPPPPPPPQLQVPVLSQASVSAAANVGASSSSSSVAGTSQSLLGGMFAPSSMASAPQYADLGGRPERAHPAKPPPLCLATDASSSIFSAAPAVTAERQQFAPPPPSPSPSAHMSATALLQKAAQMGATSSSSSFLRGLGLDVS…
				C2H2 domain	FVCEICNKGFQRDQNLQLHRRGH
ZmIDD2	Zm00001d028361	Ⅰ	3	CDS	ATGGCACTGCTGGTCAAGAGCCACCACCAAATGTTGGTCTCCTCCTCCACCTCCTCGTCGTCCCCTTCCGCGTCCCAGCAGCGGCAGCCACCGCCACCACCTCCCTCCTCCTCCTGCCTCACCGAGCAGCAGCCGTCCCCCGCCAAGCGCAAGAGGCGCCCTCCCGGCACTCCGGACCCCGATGCGGAGGTGGTGGCGCTGTCGCCGCGGACGCTGCTGGAGTCGGACAGGTACGTGTGCGAGATCTGCGGGCAGGGGTTCCAGCGCGAGCAGAACCTGCAGATGCACCGGCGGCGCCACAAGGTGCCGTGGCGGCTCGTGAAGCGGGCGCCGCCGCCTCCTGCTGCTGCTGCTGGCGGCGGCGGCGGCGCCGCCGACGCTAATAACAGCAGCGGCACA…
				Protein	MALLVKSHHQMLVSSSTSSSSPSASQQRQPPPPPPSSSCLTEQQPSPAKRKRRPPGTPDPDAEVVALSPRTLLESDRYVCEICGQGFQREQNLQMHRRRHKVPWRLVKRAPPPPAAAAGGGGGAADANNSSGTGGGAGGGAPRKRVFVCPEPSCLHHDPAHALGDLVGIKKHFRRKHGGRRQWVCARCAKGYAVQSDYKAHLKTCGTRGHSCDCGRVFSRVESFIEHQDACNSSRMRGEAVVVAVPVPVPPPSALPVIRPAVPRHPPTVAVAPPPPPELQLLPASAAASAPRTSSATTTASPSTTTTASHHQAEPHAATTTKLQLSIGPIVTAAAAAAVDCGEDESEAEELRRAVEEKAAADAARERARGEAAAAERALDEARRARQRARADLEKACAL…
				C2H2 domain	YVCEICGQGFQREQNLQMHRRRH
ZmIDD3	Zm00001d031759	Ⅰ	3	CDS	ATGTTGAGTTCTTGCGCGCCAACGACGGCCTTTCCGCCCCCAGAGGCGGGGGCCGCCGCGCCACCGGAGCCGTTCCGGTCTCTGCAGATCGCCACGACCACCAGCGCCGCCGGGGCCAAGAAGAAGCGGCGTCCCGCCGGCACTCCTGACCCCGACGCGGAGGTGGTGTCGCTGTCGCCGCGGACGCTGCTGGAGTCGGACCGGTACGTGTGCGAGATCTGCGGGCAGGGGTTCCAGCGCGACCAGAACCTGCAGATGCACCGGCGGCGGCACAAGGTGCCGTGGAAGCTGCTGAAGCGGGAGGCCGGGGAGGCGGCGCGGAAGCGCGTGTTCGTGTGCCCGGAGCCGAGCTGCCTGCACCACGACCCCTCGCACGCGCTGGGCGACCTCGTCGGCATC…
				Protein	MLSSCAPTTAFPPPEAGAAAPPEPFRSLQIATTTSAAGAKKKRRPAGTPDPDAEVVSLSPRTLLESDRYVCEICGQGFQRDQNLQMHRRRHKVPWKLLKREAGEAARKRVFVCPEPSCLHHDPSHALGDLVGIKKHFRRKHSGHRQWACARCSKAYAVHSDYKAHLKTCGTRGHTCDCGRVFSRVESFIEHQDTCNAGRTRAETSSSPASGGGYGGGTGAGFCVAAAASTSQQRHLHAAAAAAAALSRTASSASPSSGGEFGVSQQVACWPGPAMASPTAAATFHRFDQALSPPTPHERPGGIHNLELQLMPPRGSAASYYEGAAGAAPAAAVRCCASPHYSPAVHVPQPGADPMRLQLSIGFGGGDGETSAPAAAARLKEEAREQLRLAMAEKAAADD…
				C2H2 domain	YVCEICGQGFQRDQNLQMHRRRH
ZmIDD4	Zm00001d031992	Ⅱ	4	CDS	ATGGCGATGCCGTCCACCATAGCTACGAGGCATGAAGTCATGAGGATCGTCACCATCCTCACACAAGCCGCTCAGGACTTTCGGATGCTCATTGTAAAACTAGCTAGATACTCCGTGGTCGTCGTCGTCGTTGGACGTACGCCAGAAGAGGGAGCTAGAGAAGAATACCGTACAGCTGCTTCCAACATGGCAGCTGCCTCGTCTGCCCACCTGTTCGGACTCGGCGACGGGCAGATGCAGATGCAGCCGCAGCAGCAGCAGGCGCCGCCTCCTCCTCTTGTGAACAACCCGGCCGCGCCGCCGCCCAAGAAGAAGCGGAACCAACCCGCAGACCCTGACGCGGAGGTGATCGCGCTTTCCCCCAAGACGCTGATGGCGACGAACCGGTTCGTGTGCGAG…
				Protein	MAMPSTIATRHEVMRIVTILTQAAQDFRMLIVKLARYSVVVVVVGRTPEEGAREEYRTAASNMAAASSAHLFGLGDGQMQMQPQQQQAPPPPLVNNPAAPPPKKKRNQPADPDAEVIALSPKTLMATNRFVCEVCNKGFQREQNLQLHRRGHNLPWKLKQKNPKETRRRVYLCPEPTCVHHDPSRALGDLTGIKKHYCRKHGEKKWKCDKCNKRYAVQSDWKAHSKTCGTREYRCDCGTLFSRRDSFITHRAFCDALAQESARVPPMGAGMYGTGGMALGLSGMATSQLQSFQDQTHSSATTAISNNPTAQFEHLMQSSTGSPVFRGAQPTSSSSSPFYLGGAEDGHQSLSGHTSLLHGNKQAYHGLMLLPEQQHQAGSNGLLNLGFFSGGSSGQDARL…
				C2H2 domain	FVCEVCNKGFQREQNLQLHRRGH
ZmIDD5	Zm00001d032922	Ⅲ	4	CDS	ATGCAGATGATGATGCTCTCTGATCTCTCGTCTGACGACCACGAGGCCACTGGATCCAGCTCCTATGGCGGGGACATGGCCAGCTACGCCCTCAGCCCTCTCTTCCTCGCACCGGCGGCCTCGGCCACCGCGCCGCTGCCGCCACCTCCGCAGCCGCCGGCCGAGGAGCTCACCAACAAGCAGGCCGCGGGCGGCGGCAAGAGGAAGAGAAGCCAGCCGGGGAACCCAGACCCCGGCGCGGAGGTGATCGCGCTGTCGCCGCGCACGCTGGTGGCGACGAACCGGTTCGTGTGCGAGATCTGCAACAAGGGGTTCCAGCGGGACCAGAACCTGCAGCTGCACCGCCGGGGCCACAACCTCCCCTGGAAGCTCCGCCAGCGCAGCAGCCTCGTCGTCCCG…
				Protein	MQMMMLSDLSSDDHEATGSSSYGGDMASYALSPLFLAPAASATAPLPPPPQPPAEELTNKQAAGGGKRKRSQPGNPDPGAEVIALSPRTLVATNRFVCEICNKGFQRDQNLQLHRRGHNLPWKLRQRSSLVVPSSSAAAGSGGRQQQQQGEAAPTPPRKRVYVCPEPTCVHHDPARALGDLTGIKKHFSRKHGEKRWCCERCGKRYAVQSDWKAHVKGCGTREYRCDCGILFSRKDSLLTHRAFCDALAEESARLLAAAANNGSTITTTSSSNNNDLLNASNNITPLFLPFASSPPPVVVAAAQNPNNTLFFLHQELSPFLQPRVTMQQQPSPYLDLHMHVDASIVTTTGGLADGTPVSFGLALDGSVATVGHRRLTRDFLGVDGGGRQVEELQLPLCA…
				C2H2 domain	FVCEICNKGFQRDQNLQLHRRGH
ZmIDD6	Zm00001d005871	Ⅱ	3	CDS	ATGTTGGGCTTCTGCGCCCCCTCGGCCTGTTCACCTCCCGACGAGGCTACGCCAGAGCCGTTCCGTTCGCTGCAGATCGCCACCACGGTCGCCGCCGCCGCCGCCACTACAAAGAAGAAGCGCCGGCCCGCCGGCACACCAGACCCAGACGCGGAGGTGGTGTCGCTGTCGCCGCGGACGCTGCTGGAGTCGGACCGGTACGTGTGCGAGATCTGCGGGCAGGGGTTCCAGCGCGACCAGAACCTGCAGATGCATCGGCGGCGGCACAAGGTGCCGTGGAAGCTGTTGAAGCGGGAGGCCGGGGAGGCGGCGCGGAAGCGGGTCTTCGTGTGCCCGGAGCCCAGCTGCCTGCACCACCACCCCTCCCACGCGCTGGGCGACCTCGTCGGCATCAAGAAG…
				Protein	MLGFCAPSACSPPDEATPEPFRSLQIATTVAAAAATTKKKRRPAGTPDPDAEVVSLSPRTLLESDRYVCEICGQGFQRDQNLQMHRRRHKVPWKLLKREAGEAARKRVFVCPEPSCLHHHPSHALGDLVGIKKHFRRKHSGQRQWACARCSKAYAVHSDYKAHLKTCGTRGHSCDCGRVFSRVESFIEHQDSCNAGQARAGAGVAAASAGSQQQAPPAMSLSRTASSTSPSSDIAISPVAAWPAGPAPAIPSPASTAAFHWFEQVPSPRTPPPSVHHRGGHNLELQLMPPSCSGAGGDAPPRTPAAPSQSHAAAMAMQLQLSIGVCGDAGDEVLAAAREEEAREQLRQAVAEKAAADEARAQAKRQAELAERELASAKRMRRQAQVELSRAHAVRDHAL…
				C2H2 domain	YVCEICGQGFQRDQNLQMHRRRH
ZmIDD7	Zm00001d002654	Ⅱ	3	CDS	ATGGCATCGAATTCATCGGCGGCGTTCTTTGGTGTTAGGGATGGGGACCAGCAAGACCAGATTAAGCCGCTGATATCACCGCAGCAACAGCTGGCAGCGGCGCTGCCCGGTGTGGCAGGCGGTGTTCCTGCGGCGTCCGGCCAAGGCGCGCCGCCGGCGCAGCCACCGCCCAAGAAGAAGAGGACTATGCCTGACCCCGACGCTGAGGTGATCGCGCTGTCGCCCAAGACGCTTATGGCGACCAACAGGTTCGTGTGCGAGGTGTGCAACAAGGGGTTCCAGCGCGAGCAGAACCTGCAGCTGCACCGGCGCGGGCACAACCTGCCGTGGAAGCTGAAGCAGAAGAACCCGCTACAGGCGCAGCGGCGGCGCGTGTACCTGTGCCCGGAGCCGACGTGC…
				Protein	MASNSSAAFFGVRDGDQQDQIKPLISPQQQLAAALPGVAGGVPAASGQGAPPAQPPPKKKRTMPDPDAEVIALSPKTLMATNRFVCEVCNKGFQREQNLQLHRRGHNLPWKLKQKNPLQAQRRRVYLCPEPTCVHHDPARALGDLTGIKKHFCRKHGEKKWKCDKCSKRYAVQSDWKAHSKICGTREYRCDCGTLFSRRDSFITHRAFCDALAQESARLPPTSLSSLTSHLYGATSTGNMALSLSQVGSHLTSTLQDGHHHHPSAELLRLGATAGGGSSIAARLDHLLSPNGASAFRPPQGPPSSASFFLNAGASVGPDFGDDVGNGPHSFLQGNKPFHGLMQLPDLQGNGAGGPGGSGPSLFNLSFFANNGNSSGSSHEHASQGLMNNNDHFNGGAGG…
				C2H2 domain	FVCEVCSKGFQRDQNLQLHLRGH
ZmIDD8	Zm00001d006682	Ⅲ	4	CDS	ATGCCGCACCCGACGGACCCGGAGGCGGGGTCCGAGCAGAAGGCGGAGGCGCCGGCGGTGCCTTTGGCGGCTGCGGCGCCGGCTCCGGTCAAGAAGAAGCGGAACCTCCCCGGGACGCCAGATCCGGACGCCGAGGTGATCGCGCTCTCGCCGGGGACGCTGCTGGCCACGAACCGCTTCGTGTGCGAGGTGTGCGGCAAGGGCTTCCAGCGGGACCAGAACCTGCAGCTGCACCGCCGTGGCCACAACCTGCCCTGGCGCCTGCGGCAGCGCGGCCCGGGCGCGCCGCCGCCGCGCCGCCGGGTGTACGTGTGCCCCGAGCCCGCCTGCGTGCACCACTCCCCCGCGCGGGCGCTCGGGGACCTCACCGGGATCAAGAAGCACTTCTGCCGCAAGCAC…
				Protein	MPHPTDPEAGSEQKAEAPAVPLAAAAPAPVKKKRNLPGTPDPDAEVIALSPGTLLATNRFVCEVCGKGFQRDQNLQLHRRGHNLPWRLRQRGPGAPPPRRRVYVCPEPACVHHSPARALGDLTGIKKHFCRKHGEKRWACPRCAKRYAVQADLKAHAKTCGTREYRCDCGTLFTRRDSFVTHRAFCGALGEETGRVLAPPAPPSPRPPDLEADENVADLEADENVDKDNDKEGEEENEDSAVAEVEEPRRVEVVPEEPQRIPSPPPLPKEPPCRPSPPPLPQEQLSPPPSPKEPPCCHPSPPPLPKEPQRLPFPPEQHAVVVALVPNVDEPEVVAVPSVTAELEDETDQDEDACFQEADQYKDSELEVSNLLDKDTPMLPCFLASPSEAIGTDGSGTTT…
				C2H2 domain	FVCEVCGKGFQRDQNLQLHRRGH
ZmIDD9	Zm00001d039254	Ⅲ	1	CDS	ATGCATGCATGTAATACAGACCCTGCCGCGGAGGTGATCGCGCTTTCGCCGCGGACGCTGCTGGCGACGAACCGGTTCGTGTGCGAGATCTGCGGCAAGGGGTTCCAGCGCGACCAGAACCTGCAGCTGCACCGGCGCGGCCACAACCTCCCCTGGAAGCTCCGGCAGCGCAGCGCGGGGAAGGAGCCCCGGAAGCGCGTCTACGTGTGCCCGGAGAAGACGTGCGTCCACCACAACCCGTCCCGCGCGCTGGGCGACCTCACGGGCATCAAGAAGCACTTCTGCCGCAAGCACGGCGAGAAGAAGTGGAAGTGCGACAAGTGCAACAAGCGCTACGCTGTGCAGTCCGACTGGAAGGCGCACGCCAAGACCTGCGGCACCAGGGAGTACCGATGCGAC…
				Protein	MHACNTDPAAEVIALSPRTLLATNRFVCEICGKGFQRDQNLQLHRRGHNLPWKLRQRSAGKEPRKRVYVCPEKTCVHHNPSRALGDLTGIKKHFCRKHGEKKWKCDKCNKRYAVQSDWKAHAKTCGTREYRCDCGTLFSRRDSFITHRAFCDALAEETAYAPLGPHVGDLSLPSMVGHIGANGSIMLPGAPPQLYADLFAPAPPQLGWLCGNNGKLASSNASELTSAAASGKQETDSVLSMFSRQQHANPAVAGAGDMMSATALLQKAAQMGADSGRQQSSDDGAGGLLSSASSLRGPGPGTNTLMSLPYDVLSAVRHAGLVKNAAVDVGREETRDFLGVGMQALCSSSLNGWI
				C2H2 domain	FVCEICGKGFQRDQNLQLHRRGH
ZmIDD10	Zm00001d039467	Ⅲ	3	CDS	ATGATGCTCAAGGATCTGGCAGCAATTCAGCAGCATCACCACCAGCAGCAGCTGGCCGCGGCCGCCGCCGACGAGAACATGTCTAACTTGACCTCCGCCTCCGGCGACCAGGCCAGCGTCTCGTCCCACCCCGTCCCGCCTCCCGCCAAGAAGAAGCGCAGCCTCCCCGGGAATCCAGACCCGGACGCGGAGGTCATCGCGCTGTCGCCGCGGACGCTGATGGCTACGAACCGCTACGTGTGCGAGGTGTGCGGCAAGGGGTTCCAGCGCGACCAGAACCTGCAGCTGCACCGGCGCGGCCACAACCTGCCGTGGAAGCTCAAGCAGCGCAACCCAAAGGAGGTGGTGCGCAAGAAGGTGTACGTGTGCCCGGAGCCCGGCTGCGTGCACCACGACCCC…
				Protein	MMLKDLAAIQQHHHQQQLAAAAADENMSNLTSASGDQASVSSHPVPPPAKKKRSLPGNPDPDAEVIALSPRTLMATNRYVCEVCGKGFQRDQNLQLHRRGHNLPWKLKQRNPKEVVRKKVYVCPEPGCVHHDPARALGDLTGIKKHFSRKHGEKKWKCDRCAKRYAVQSDWKAHSKVCGTREYRCDCGTLFSRRDSFITHRAFCDALAEESARAVTAAAAVAGQHHPGPAGMLFSQAAGGGDGGAGLHLPPGVLDPSQTLGGGHGMSLQELCLKREQQQQQQFAPSSWLTAQHHQQELELPGSAVFGLARPLDQQEYMGNSTTESTAGLSGFVGFSPSAAGGAAASAHMSATALLQKAAQMGATLSRPSNQGQMAGTHSSSTTNAGTGTANAAAAAASN…
				C2H2 domain	YVCEVCGKGFQRDQNLQLHRRGH
ZmIDD11	Zm00001d042202	Ⅲ	3	CDS	ATGTCGGGAGCTGCCGGTAGGGAGTGCACCGGCGGCGGCGGCAGTCGTAGCAGCAGCTTCTCTTCTGTGAGCAACGCATCACCTACGGAGGTGGAGGAAGAGTTCCTGCGGTACCACACCAATCCGCTCCTCGGTGGCCCCACGACGGAGATGCGAGACGACGGCGGCGTCACCGGCGGCCCCTCGGATCAGCCGCCGCTGACTGTGAAGAAGAAGAGAAGCCTTCCCGGGACACCAGACCCGAGCGCGGAGGTGATCGCGCTGTCGCCGCGGACGCTGATGGCGACGAACCGGTTCGTGTGCGAGATCTGCCACAAGGGCTTCCAGCGCGACCAGAACCTGCAGCTGCACCGGCGCGGGCACAACCTGCCGTGGAAGCTGCGGCAGCGCGGCGGGCCC…
				Protein	MSGAAGRECTGGGGSRSSSFSSVSNASPTEVEEEFLRYHTNPLLGGPTTEMRDDGGVTGGPSDQPPLTVKKKRSLPGTPDPSAEVIALSPRTLMATNRFVCEICHKGFQRDQNLQLHRRGHNLPWKLRQRGGPGGGADGGGPPRKRVYVCPEASCVHHNPARALGDLTGIKKHYCRKHGEKKWKCERCAKRYAVHSDWKAHAKVCGTREYKCDCGTVFSRRDSFVTHRAFCDALAQENNKLSQPMNMATVASALQGQAPHHHHHHHLALPSSSQAADDHDNAAGDDDNDGDDFAIDTKSPQLRMLPAMSDSAAADNNNNNNPLFLPPPSMAGCMLSSLQQGGAARPAPPPPASYFSGGGKAAGLYDPSASSPASMSATALLQKAAEMGATAGGYGAGAG…
				C2H2 domain	FVCEICHKGFQRDQNLQLHRRGH
ZmIDD12	Zm00001d044261	Ⅲ	3	CDS	ATGTTCCACCATCAGCAGGAGCTCCTACAGGCAGAAGCTGCGGCGGCAGATCGGGAGAGCAGCATGTCCAACAACCTCACCTCCTCCGCGCCCGGCGGCCCCAACGCGGCGCCAGCTGCTGCTGCGGCCACCGGCAATAATAACAAGCGAAAGCGGAGCCTCCCAGGCAACCCCGACCCCGAGGCGGAGGTCGTGGCTCTGTCTCCGGCGACGCTGATGGCGACGAACCGCTTCTTGTGCGAGATCTGCGGGAAAGGGTTCCAGCGGGACCAGAACCTGCAGCTGCACCGGCGCGGGCACAACCTGCCGTGGAAGCTGAAGCAGCGGGGCGCGGGCAAGGAGGCGCAGCGGAAGAAGGTGTACGTGTGCCCGGAGGCGTCGTGCGTGCACCACGACCCG…
				Protein	MFHHQQELLQAEAAAADRESSMSNNLTSSAPGGPNAAPAAAAATGNNNKRKRSLPGNPDPEAEVVALSPATLMATNRFLCEICGKGFQRDQNLQLHRRGHNLPWKLKQRGAGKEAQRKKVYVCPEASCVHHDPARALGDLTGIKKHFFRKHGEKKWKCDKCSKRYAVHSDWKAHSKICGTREYKCDCGTVFSRRDSFITHRAFCDALTEESAKAIGGVNAMAAPVHHHHHPMLFSPPPAHVMQQQDVLLLQEHQHHQHQQQQQEDDVMQQPPPQQCNYAMKTEMPPWPAMAYDHPLLQPLCNAAAAAAAQGSAATSAPQLPAASAHLSATALLQKAAQMGATIGGAGYTQMAGPATSATAAFGLGLPGLQNAQHHHPQQQDGGGGVMAAGLARTASSHG…
				C2H2 domain	LCEICGKGFQRDQNLQLHRRGH
ZmIDD13	Zm00001d016632	Ⅲ	3	CDS	ATGTCGTCACACACGTCGGAAGAAGAATCCCTCAGCAGCTTCCAGCAGCAGCAGGCCAAGCTAGAAGCCTGCCATGCTGCTGGGTCGAGCAAGGCTGACGCAGCGGCAGCAGCCATGCCTGTGGTGAAAAAGAGACGCGGCCACCCAGGAACTCTAGATCCTGATGTGGAAGTAGTGGCTTTGTCACCCAAGACACTCCTGGCAACAAACAGGTACATATGCGAGGTCTGTCACAAGGGCTTCCAGAGGGACCAGAACCTGCAGCTCCACAGGAGAGGCCACAACCTACCATGGAAGCTGAAGCAGAGGAGCAGCACCGAAGCCAAGAAGAAGGTGTATGTCTGCCCTGAGGCCACCTGCCCTCATCACGACGCGAGCCGAGCCCTGGGCGACCTCACG…
				Protein	MSSHTSEEESLSSFQQQQAKLEACHAAGSSKADAAAAAMPVVKKRRGHPGTLDPDVEVVALSPKTLLATNRYICEVCHKGFQRDQNLQLHRRGHNLPWKLKQRSSTEAKKKVYVCPEATCPHHDASRALGDLTGIKKHYSRKHGEKKWKCDRCSKKYAVQSDWKAHTKICGTKEYRCDCGTIFSRKDSFITHRAFCDALAEDTSRVNHSLATMVGSLHGHQQDIFSHGVPTFPTSPPDVMANLSSINDHNSDSHLRSLSPYALITRNTALFSNQISPKDPGGFPLDGSASSYPYMSMTSPYMSATALLQKAAEMGAKTSQDPISPLLLKSFPSNVTTPSPRDHHMDISSGSQGDSLGNSAANSVVVGIKAAEDEGSYLSGRGSILMSSPWVNTYRPATV…
				C2H2 domain	YICEVCHKGFQRDQNLQLHRRGH
ZmIDD14	Zm00001d017560	Ⅱ	3	CDS	ATGGCATCCAATTCATCAGCGGCCGCTGTGGCAGCCATGTTTGGAATTAGGGATGCCGACCACCAAGACCAGATGAAGCCGCTGCTTGCGCAGCAGCACCAGCACCAGCACCAGCACCAGATGCCACCTGCGCCGCTGCTCAACGCCGCTTCGTCGTCGGCGGGGCCCGGCCAGGCGGCAGGGGCAACCCCGCCGGCAGTGAAGAAGAAGAGAAACCTACCAGACCCTGACGCGGAGGTGATCGCGCTATCGCCCAAGACGCTGCTGGCGACGAACCGGTTCGTGTGCGAGGTGTGCAACAAGGGGTTCCAGCGGGAGCAGAACCTGCAGCTGCACCGGCGCGGGCACAACCTGCCGTGGAAGCTGAAGCAGAAGGACCCGTCGCAGGCGCAGCGGCGG…
				Protein	MASNSSAAAVAAMFGIRDADHQDQMKPLLAQQHQHQHQHQMPPAPLLNAASSSAGPGQAAGATPPAVKKKRNLPDPDAEVIALSPKTLLATNRFVCEVCNKGFQREQNLQLHRRGHNLPWKLKQKDPSQAQRRRVYLCPEPTCAHHDPSRALGDLTGIKKHFCRKHGEKKWKCDKCSKRYAVQSDWKAHSKVCGTREYRCDCGTLFSRRDSFITHRAFCDALAQESARLPPPGLTASHLYGATNAANMGLSLSQVGSHLASTLGADAHGHHQDLLRLGGSNAASRFEHLLGPSNASAFRPLPPPPSSAFLMGAPQEFGAGDGSGSHGFLQGKPFHSLMHLPDLQGNGAGGASASSATGLFNLGYIANSANSSGTSSHGHASQGHLTSDQFSEGGGGGGS…
				C2H2 domain	FVCEVCNKGFQREQNLQLHRRGH
ZmIDD15	Zm00001d020683	Ⅰ	3	CDS	ATGTTGGGCTTCTGCGCCCCCGCCGCCGGATCGCCTCCCGACGAGGCGATGCCGGAGCCGTTCTGTTCGCTGCAGATCGCCACCACGGCCGCCGCCGCCGCCACGACAAAGAAGAAGCGCCGGCCCGCCGGCACACCAGACCCGGACGCGGAGGTGGTCTCGCTGTCGCCGCGGACGCTGCTGGAGTCGGACCGGTACGTGTGCGAGATCTGCGGGCAGGGGTTCCAGCGCGACCAGAACCTGCAGATGCACCGGCGGCGGCACAAGGTGCCGTGGAAGCTGCTGAAGCGGGAGGCCGGGGAGGCGGCGCGGAAGCGGGTGTTCGTGTGCCCGGAGCCCAGCTGCCTGCACCACAACCCCTCCCACGCGCTGGGCGACCTCGTCGGCATCAAGAAGCAC…
				Protein	MLGFCAPAAGSPPDEAMPEPFCSLQIATTAAAAATTKKKRRPAGTPDPDAEVVSLSPRTLLESDRYVCEICGQGFQRDQNLQMHRRRHKVPWKLLKREAGEAARKRVFVCPEPSCLHHNPSHALGDLVGIKKHFRRKHSGQRQWACARCSKAYAVHSDYKAHLKTCGTRGHSCDCGRVFSRVESFIEHQDTCNAGRARADPSPACGAGSTGVAAASAGSQPQAPPPMSLSRTASSTSPSSDIVISPVAAWPGSSAPTIPSPATAAFHRFEQVPSPRTPPSDHHHRGGHNLELQLMPPSGSGVVGRGAPGVAEYGVAPRTPAAPPQSHPATMQLQLSIGVCGGGGFGDEAMLAAAREKEEVEAREQLRQAVAEKAAANEARAQARRHAELAEQELASAKR…
				C2H2 domain	YVCEICGQGFQRDQNLQMHRRRH
ZmIDD16	Zm00001d021403	Ⅱ	2	CDS	ATGCATGCAGATCCTGACGCGGAGGTGATCGCGCTGTCTCCGCGGACGCTGCTGGCGACGAACCGCTTCGTGTGCGAGGTGTGCAACAAGGGGTTCCAGCGGGAGCAGAACCTGCAGCTGCACCGGCGCGGCCACAACCTGCCGTGGAAGCTGAAGCAGAAGAACCCCAGGGAGGCCCGCCGCCGGGTGTACCTGTGCCCGGAGCCGACGTGCGTGCACCACGACCCGTCCCGGGCGCTGGGCGACCTCACGGGGATCAAGAAGCACTACTGCCGCAAGCACGGCGAGAAGAAGTGGAAGTGCGACAAGTGCAGCAAGCGCTACGCCGTGCAGTCCGACTGGAAGGCGCACTCCAAGACCTGCGGCACCCGCGAGTACCGATGCGACTGCGGCACCCTC…
				Protein	MHADPDAEVIALSPRTLLATNRFVCEVCNKGFQREQNLQLHRRGHNLPWKLKQKNPREARRRVYLCPEPTCVHHDPSRALGDLTGIKKHYCRKHGEKKWKCDKCSKRYAVQSDWKAHSKTCGTREYRCDCGTLFSRRDSFITHRAFCDALARESAQMPPLGAGLYVGPGSMSLGLSQIHGFADQAQSSSAAAAPQFDHIMPSSSGSSSMFRSQASASSPSYFLGGSAPPAAAQDFSEDGSQGSQGPLLHGKAHFHGLMMQLPEQQHQPGSSNAAVGANGSNILNLGFFSAGNSGGTSGSLQDARIAIQDQFNLSGSGSGSAEHGNNVMVASIGSHLGRGFPSLYSSSPSAGMAQNSATALLMKAAQMGSTTSSTTHNNHNGPTTTSTLLRATGFSGATG…
				C2H2 domain	FVCEVCNKGFQREQNLQLHRRGH
ZmIDD17	Zm00001d021932	Ⅲ	4	CDS	ATGCCGCCACCGCACCCGACGGACGCGGAGGCGGGGCCCGAGCAGGTGGCGCCGACGGAGGCGGTGCCCTTGGCGGCTGCGGCGCCGGCGCCGGTCAAGAAGAAGCGGAACCTTCCCGGGACGCCAGATCCGGACGCCGAGGTGATCGCGCTCTCGCCGGGGACGCTGCTGGCCACGAACCGCTTCGTGTGCGAGGTGTGCGGCAAGGGCTTCCAGCGGGACCAGAACCTGCAGCTGCACCGCCGCGGCCACAACCTGCCCTGGCGCCTGCGGCAGCGCGGGCCCGGCGCGGCCCCGCCGCGCCGCCGGGTGTACGTGTGCCCCGAGCCCGGCTGCGTGCACCACTCCCCGACCCGAGCCCTCGGGGACCTCACCGGGATCAAGAAGCACTTCTGCCGC…
				Protein	MPPPHPTDAEAGPEQVAPTEAVPLAAAAPAPVKKKRNLPGTPDPDAEVIALSPGTLLATNRFVCEVCGKGFQRDQNLQLHRRGHNLPWRLRQRGPGAAPPRRRVYVCPEPGCVHHSPTRALGDLTGIKKHFCRKHGEKRWACPRCGKRYAVQADLKAHAKTCGTREYRCDCGTLFTRRDSFVTHRAFCGALGEETGRALAPPAPPSPRPPDLEAEENVDNDKEEEENEDSALAEVEVPQRVEVAVPEEPEPEPQRIPSPPPLPQEPPCRPSPPPLPQEQPRRVSPPPLPKEPPCHHPTPPPLPKEPQRLPFPPEQQAVVALVPNVDEPEVAAVGTVAAKLEDETDQDETTCFQEADQYKDAELEVSNLLDKDTPMLPCFLPSPSEAIGTDGSSTTCGAG…
				C2H2 domain	FVCEVCGKGFQRDQNLQLHRRGH
ZmIDD18	Zm00001d008842	Ⅲ	3	CDS	ATGATGCTCAAGGATTTGGCAGCAATTCAGCACCAGCAGCAGCAACTGGCTGCCGACGAAAACATGTCTAACCTGACCTCCGCTTCAGGCGACCTGCAGGCCAGCGTCTCGTCCCACCCCGCCCCGCCTCCCGCCAAGAAGAAGCGCAGCCTCCCCGGGAACCCAGACCCGGACGCGGAGGTCATCGCGCTGTCGCCGCGGACGCTGATGGCGACGAACCGCTACGTGTGCGAGGTGTGCGGCAAGGGGTTCCAGCGCGACCAGAACCTGCAGCTGCACCGGCGCGGCCACAACCTGCCGTGGAAGCTCAAGCAGCGCAACCCCAAGGAGGCGGTGCGCAAGAAGGCGTACGTGTGCCCGGAGCCCGGCTGCGTGCACCACGACCCCGCGCGCGCGCTC…
				Protein	MMLKDLAAIQHQQQQLAADENMSNLTSASGDLQASVSSHPAPPPAKKKRSLPGNPDPDAEVIALSPRTLMATNRYVCEVCGKGFQRDQNLQLHRRGHNLPWKLKQRNPKEAVRKKAYVCPEPGCVHHDPARALGDLTGIKKHFSRKHGEKKWKCDRCAKRYAVHSDWKAHSKVCGTREYRCDCGTHFSRRDSFITHRAFCDALAEESARAVTAAAAVVVGQQQAAGGGDGSAGLHLPPDVLDPSQTLGGGHGMSLQELCLKREQQQQFAPSSWLTAHHQQELPGSARLLEQHEYIGSSTPESTAGLSGFVGLSPSAAGEAAASAHMSATALLQKAAQMGATLSRPSNQEQMASTHSHSSTTNAGTGSASAAAAAAINVPGTGAGAFGFGAPHHFGAEER…
				C2H2 domain	YVCEVCGKGFQRDQNLQLHRRGH
ZmIDD19	Zm00001d009030	Ⅲ	2	CDS	ATGGCAAGTGAAGCGGCGGCGGCATCCGTCATCTCCAGAAACCCCTGCCTATTCGCTCCTCCTCTTATCACCAACCAGCAGCAGCCGTCTCATCAAGAACCGCAGCAGGAGATGCCTCTCCCTCCTCCCGCCAAGAAGAAGCGCAACCTCCCGGGCACACCAGACCCTGCCGCGGAGGTGATCGCGCTTTCGCCGCGGACGCTGTTGGCGACGAATCGGTTCGTGTGCGAGATCTGCGGCAAGGGGTTCCAGCGCGACCAGAACCTGCAGCTGCACCGGCGCGGCCACAATCTCCCCTGGAAGCTCCGACAGCGCAGCGCGGGGAAGGAGCCCCGGAAGCGCGTCTACGTGTGCCCCGAGAAGACGTGCGTCCACCACAACCCGTGCCGCGCGCTGGGC…
				Protein	MASEAAAASVISRNPCLFAPPLITNQQQPSHQEPQQEMPLPPPAKKKRNLPGTPDPAAEVIALSPRTLLATNRFVCEICGKGFQRDQNLQLHRRGHNLPWKLRQRSAGKEPRKRVYVCPEKTCVHHNPCRALGDLTGIKKHFCRKHGEKKWKCDKCNKRYAVQSDWKAHAKTCGTREYRCDCGTLFSRRDSFITHRAFCDALAEETARQLNAAAAATSHLNNNAHVVVGLSLPSMVGHINGATGSILLPGAPPQLYADLFAPAPPQLSWPCELTSAAAAASSSAAASGKQKTDSVPSVFSGYPHANLAVPGAGAADMSATALLQKAAQMGAVTSGSGSVIMTTTAGGHHQPSDCGAGLLFSALTQQNATNLISGSGTSTLTTSQLTATGGNMPYDVLSA…
				C2H2 domain	FVCEICGKGFQRDQNLQLHRRGH
ZmIDD20	Zm00001d011223	Ⅲ	3	CDS	ATGTTCCACCATCAGCAGGAGCTCTTGCAGGCAGAAGCTGCAGCGGCAGATCGGGAGAGCAGCATGTCCAACCTCACCTCCTCCACGTCCGGCGGCCCCAACGCGGCGCCTGCTGCTGCTGCTGCTGCCCCGCCGGCGCCCGCGGCCTCCGGCAACAACAAGCGGAAACGGAGCCTCCCAGGCAACCCCGACCCCGAGGCGGAGGTCGTGGCTCTCTCCCCGGCGACGCTGATGGCGACGAACCGTTTCGTGTGCGAGATCTGCGGGAAGGGGTTCCAGCGGGACCAGAACCTGCAGCTGCACCGGCGCGGCCACAACCTGCCGTGGAAGCTGAAGCAGCGCGGCACGGGCAAGGAGGCGCAGCGGAGGAAGGTGTACGTGTGCCCCGAGGCGTCGTGC…
				Protein	MFHHQQELLQAEAAAADRESSMSNLTSSTSGGPNAAPAAAAAAPPAPAASGNNKRKRSLPGNPDPEAEVVALSPATLMATNRFVCEICGKGFQRDQNLQLHRRGHNLPWKLKQRGTGKEAQRRKVYVCPEASCVHHDPARALGDLTGIKKHFFRKHGEKKWKCDKCSKKYAVHSDWKAHSKICGTREYKCDCGTIFSRRDSFITHRAFCDALTEESAKAIGLNAMAAVPAQHHHHPMLFSPPPTHVMQQDVALLQEHHHQEVMQQEHCNYAMKTEMPPWPGMTYDHPLLQPLCNAAAPQSSATSTPPPPTTMQLPAAYAHLSATALLQKAAQMGATVAGAGYTQMAGAATSATFGLGLPDLQNTQQQQHQDGEIMAGLARTASHGRGGEEGGGGGGDGM…
				C2H2 domain	FVCEICGKGFQRDQNLQLHRRGH
ZmIDD21	Zm00001d047976	Ⅰ	3	CDS	ATGGCACTACTGGTCAAGAGCCACCAGCAAATGTTGGTCTCCTCCTCCACCACCTCCTCGTCGTCCCCTTCGTCGGCGTCCCAGCAGCGGCACCCGCCGCCACCTCCTCCTCCCTCCTCCTCCTGCCTCACCGACCAGCAACAGCCGTCCCCAGCCAAGCGCAAGAGGCGCCCTCCCGGCACGCCGGACCCCGATGCGGAGGTGGTGGCGCTGTCGCCGCGGACGCTGCTGGAGTCGGACCGGTACGTGTGCGAGATCTGCGGGCAGGGGTTCCAGCGCGAGCAGAACCTGCAGATGCACCGGCGGCGGCACAAGGTGCCGTGGCGGCTCGTGAAGCGGGCGCCGCCGCCTGCTGGCGGCGGCGAGGACAGCGCCGGCGCTAATAATAGTAGCACAGCT…
				Protein	MALLVKSHQQMLVSSSTTSSSSPSSASQQRHPPPPPPPSSSCLTDQQQPSPAKRKRRPPGTPDPDAEVVALSPRTLLESDRYVCEICGQGFQREQNLQMHRRRHKVPWRLVKRAPPPAGGGEDSAGANNSSTAGTGVGGGGGGPRKRVFVCPEPSCLHHDPAHALGDLVGIKKHFRRKHGGRRQWVCARCAKGYAVQSDYKAHLKTCGTRGHSCDCGRVFSRVESFIEHQDACNSSRIRGEAVAVAVPAPPSALPVIRPAVPRHQPTVAPAPPPPELQLLPASAAASAPLASTPTASLSTTTNASQEQEPHAAAAATTTTKLQLSIGPTVIAPGADAAAATASAVGEEDDSEAKELRRAMKEKAAADAARARARGEAAAAERALDEARRARQRARADLE…
				C2H2 domain	YVCEICGQGFQREQNLQMHRRRH
ZmIDD22	Zm00001d026113	Ⅱ	3	CDS	ATGATGGCGTCGAATTCACCGGCGGCGGCGTTCTTTGGTGTTAGGGATGGGGACCAGCAAGACCACCAGATTAAGCCGCTGATATCACCGCAGCAGCAGCAGCAGCTGGCAGCGGCACTGCCCAGCGTGGCGTCCGGCCAAGGCGCGCCGACGGCGGCGGCGCAGCCACCGCCCAAGAAGAAGAGGACTATGCCCGACCCAGACGCTGAGGTGATCGCCCTGTCGCCCAAGACGCTGATGGCGACCAACAGGTTCGTGTGCGAGGTGTGCAGCAAGGGGTTCCAGCGAGAGCAGAACCTGCAGCTGCACCGGCGCGGGCACAACCTGCCGTGGAAGCTGAAGCAGAAGGACCCGCTGCAGGCGCAGCGGCGGCGCGTGTACCTGTGCCCGGAGCCGACG…
				Protein	MMASNSPAAAFFGVRDGDQQDHQIKPLISPQQQQQLAAALPSVASGQGAPTAAAQPPPKKKRTMPDPDAEVIALSPKTLMATNRFVCEVCSKGFQREQNLQLHRRGHNLPWKLKQKDPLQAQRRRVYLCPEPTCAHHDPARALGDLTGIKKHFSRKHGEKKWKCDKCSKRYAVQSDWKAHSKICGTREYRCDCGTLFSRRDSFITHRAFCDALAQESARLPPTSSLSNLTSHLYGAATNAGNMALSLSQVGSHLTSTLQDGHHHRPSPELLRLGATAGGGGGSSIAARLDHLLSPNGASAFRPAQPPSFFHNAGASVGQDFGDDAGNGPHSFLQLQANKPFHGLLMQLPDLQGNGAGGPGASGGPSSLFSLGFFANNGNSSSGSSHEHASQGLMNSDQF…
				C2H2 domain	FVCEVCSKGFQREQNLQLHRRGH

## Sheet: S3
Table S3. The information of IDDs in A. thaliana and O. sativa.
Species	Gene Name	Gene ID	Length	Sequences
Arabidopsis thaliana	AtIDD1	AT5G66730	500	MPVDLDNSSTVSGDASVSSTGNQNLTPKSVGKKKRNLPGMPDPDAEVIALSPKTLMATNRFVCEICNKGFQRDQNLQLHRRGHNLPWKLRQRSTKEVRKKVYVCPVSGCVHHDPSRALGDLTGIKKHFCRKHGEKKWKCEKCSKKYAVQSDWKAHSKICGTKEYKCDCGTLFSRRDSFITHRAFCDALAEESAKNHTQSKKLYPETVTRKNPEIEQKSPAAVESSPSLPPSSPPSVAIAPAPAISVETESVKIISSSVLPIQNSPESQENNNHPEVIIEEASRTIGFNVSSSDLSNDHSNNNGGYAGLFVSSTASPSLYASSTASPSLFAPSSSMEPISLCLSTNPSLFGPTIRDPPHFLTPLPPQPAMSATALLQKAAQMGSTGSGGSLLRGLGIVST…
	AtIDD2	AT3G50700	452	MPVDLDNSSTVSGEASVSISSTGNQNPLPNSTGKKKRNLPGMPDPESEVIALSPKTLLATNRFVCEICNKGFQRDQNLQLHRRGHNLPWKLRQKSNKEVKKKVYVCPEVSCVHHDPSRALGDLTGIKKHFCRKHGEKKWKCDKCSKKYAVQSDWKAHSKICGTKEYKCDCGTLFSRRDSFITHRAFCDALAEENARSHHSQSKKQNPEILTRKNPVPNPVPAPVDTESAKIKSSSTLTIKQSESPKTPPEIVQEAPKPTSLNVVTSNGVFAGLFESSSASPSIYTTSSSSKSLFASSSSIEPISLGLSTSHGSSFLGSNRFHAQPAMSATALLQKAAQMGAASSGGSLLHGLGIVSSTSTSIDAIVPHGLGLGLPCGGESSSGLKELMMGNSSVFGPKQ…
	AtIDD3	AT1G03840	506	MTTEDQTISSSGGYVQSSSTTDHVDHHHHDQHESLNPPLVKKKRNLPGNPDPEAEVIALSPKTLMATNRFLCEICGKGFQRDQNLQLHRRGHNLPWKLKQRTSKEVRKRVYVCPEKSCVHHHPTRALGDLTGIKKHFCRKHGEKKWKCEKCAKRYAVQSDWKAHSKTCGTREYRCDCGTIFSRRDSFITHRAFCDALAEETARLNAASHLKSFAATAGSNLNYHYLMGTLIPSPSLPQPPSFPFGPPQPQHHHHHQFPITTNNFDHQDVMKPASTLSLWSGGNINHHQQVTIEDRMAPQPHSPQEDYNWVFGNANNHGELITTSDSLITHDNNINIVQSKENANGATSLSVPSLFSSVDQITQDANAASVAVANMSATALLQKAAQMGATSSTSPTTTI…
	AtIDD4	AT2G02080	515	MSSSSYNTSVIPSSSSSAQPFFITSSGTGDNDFNRKDTFMSMIQQPNSSAPPPKKRRNQPGNPNPDAEVVALSPKTLMATNRFICDVCNKGFQREQNLQLHRRGHNLPWKLKQKSTKEVKRKVYLCCGTKEYRCDCGTIFSRRDSYITHRAFCDALIQETARNPTVSFTSMTAASSGVGSGGIYGRLGGGSALSHHHLSDHPNFGFNPLVGYNLNIASSDNRRDFIPQSSNPNFLIQSASSQGMLNTTPNNNNQSFMNQHGLIQFDPVDNINLKSSGTNNSFFNLGFFQENTKNSETSLPSLYSTDVLVHHREENLNAGSNVSATALLQKATQMGSVTSNDPSALFRGLASSSNSSSVIANHFGGGRIMENDNNGNLQGLMNSLAAVNGGGGSGGSIFD…
	AtIDD5	AT2G02070	602	MAASSSSAASFFGVRQDDQSHLLPPNSSAAAPPPPPPHHQAPLPPLEAPPQKKKRNQPRTPNSDAEVIALSPKTLMATNRFICEVCNKGFQREQNLQLHRRGHNLPWKLKQKSTKEVKRKVYLCTKEYRCDCGTLFSRRDSFITHRAFCDALAQESARHPTSLTSLPSHHFPYGQNTNNSNNNASSMILGLSHMGAPQNLDHQPGDVLRLGSGGGGGGAASRSSSDLIAANASGYFMQEQNPSFHDQQDHHHHHQQGFLAGNNNIKQSPMSFQQNLMQFSHDNHNSAPSNVFNLSFLSGNNGVTSATSNPNAAAAAAVSSGNLMISNHYDGENAVGGGGEGSTGLFPNNLMSSADRISSGSVPSLFSSSMQSPNSAPHMSATALLQKAAQMGSTSSNNN…
	AtIDD6	AT1G14580	467	MSSSYNTIALSSTPTFLLSSAAAGPGPNNFNRQEAAMTMVQQQPTSSVAPPPKKRRNQPGNPNPDAEVIALSPKTIMATNRFLCEVCNKGFQREQNLQLHRRGHNLPWKLKQKSNKEVRRKVYLCPEPSCVHHDPARALGDLTGIKKHYYRKHGEKKWKCDKCSKRYAVQSDWKAHSKTCGTKEYRCDCGTIFSRRDSYITHRAFCDALIQESARNPTVSFTAMAAGGGGGARHGFYGGASSALSHNHFGNNPNSGFTPLAAAGYNLNRSSSDKFEDFVPQATNPNPGPTNFLMQCSPNQGLLAQNNQSLMNHHGLISLGDNNNNNHNFFNLAYFQDTKNSDQTGVPSLFTNGADNNGPSALLRGLTSSSSSSVVVNDFGDCDHGNLQGLMNSLAATTD…
	AtIDD7	AT1G55110	455	MMMNRDILFHQQQQQQMEENMSNLTSASGDQASVSSGNRTETSGSNINQHHQEQCFVPQSSLKRKRNQPGNPDPEAEVMALSPKTLMATNRFICEVCNKGFQRDQNLQLHKRGHNLPWKLKQRSNKDVVRKKVYVCQSDWKAHAKTCGTKEYKCDCGTLFSRRDSFITHRAFCDALAEESARAMPNPIMIQASNSPHHHHHQTQQNIGFSSSSQNIISNSNLHGPMKQEESQHHYQNIPPWLISSNPNPNGNNGNLFPPVASSVNTGRSSFPHPSPAMSATALLQKAAQMGSTKSTTPEEEERSSRSSYNNLITTTMAAMMTSPSLMSHNEILSFANNLGNCLNTSATEQQQQQHSHQD
	AtIDD8	AT5G44160	466	MTSEVLQTISSGSGFAQPQSSSTLDHDESLINPPLVKKKRNLPGNPDPEAEVIALSPTTLMATNRFLCEVCGKGFQRDQNLQLHRRGHNLPWKLKQRTSKEVRKRVYVCPEKTCVHHHSSRALGDLTGIKKHFCRKHGEKKWTCEKCAKRYAVQSDWKAHSKTCGTREYRCDCGTIFSRRDSFITHRAFCDALAEETAKINAVSHLNGLAAAGAPGSVNLNYQYLMGTFIPPLQPFVPQPQTNPNHHHQHFQPPTSSSLSLWMGQDIAPPQPQPDYDWVFGNAKAASACIDNNNTHDEQITQNANASLTTTTTLSAPSLFSSDQPQNANANSNVNMSATALLQKAAEIGATSTTTAATNDPSTFLQSFPLKSTDQTTSYDSGEKFFALFGSNNNIGLMS…
	AtIDD9	AT3G45260	446	MMMPDDHHPLSFPSYVLHQEHIAPNPNPNPNPTSSNSAKRKRNLPGNPDPDAEVIALSPNSLMTTNRFICEVCNKGFKRDQNLQLHRRGHNLPWKLKQRTNKEQVKKKVYICPEKTCVHHDPARALGDLTGIKKHFSRKHGEKKWKCDKCSKKYAVMSDWKAHSKICGTKEYRCDCGTLFSRKDSFITHRAFCDALAEESARFVSVPPAPAYLNNALDVEVNHGNINQNHQQRQLNTTSSQLDQPGFNTNRNNIAFLGQTLPTNVFASSSSPSPRSASDSLQNLWHLQGQSSHQWLLNENNNNNNNILQRGISKNQEEHEMKNVISNGSLFSSEARNNTNNYNQNGGQIASMSATALLQKAAQMGSKRSSSSSSNSKTFGLMTSIFNNKQAENIKTKEV…
	AtIDD10	AT5G03150	503	MQMIPGDPFSISSSMGGFVHQETHLHHLQQQIPDLNPNSNPNPNAKPNSSSAKKKRNQPGTPDPDADVIALSPTTLMATNRFVCEICNKGFQRDQNLQLHRRGHNLPWKLKQRSKQEVIKKKVYICPIKTCVHHDASRALGDLTGIKKHYSRKHGEKKWKCEKCSKKYAVQSDWKAHAKTCGTREYKCDCGTLFSRKDSFITHRAFCDALTEEGARMSSLSNNNPVISTTNLNFGNESNVMNNPNLPHGFVHRGVHHPDINAAISQFGLGFGHDLSAMHAQGLSEMVQMASTGNHHLFPSSSSSLPDFSGHHQFQIPMTSTNPSLTLSSSSTSQQTSASLQHQTLKDSSFSPLFSSSSENKQNKPLSPMSATALLQKAAQMGSTRSNSSTAPSFFAGPT…
	AtIDD11	AT3G13810	513	MMNKDMLLHQHQQPQQDENMSNLTSASGDQASVSSGNITEASGSNYFPHHQQQQEQQQQQLVVPDSQTQKKRRNQPGNPDPESEVIALSPKTLMATNRFVCEICNKGFQRDQNLQLHRRGHNLPWKLKQRSNKEVIRKKVYVCPEASCVHHDPSRALGDLTGIKKHFCRKHGEKKWKCDKCSKKYAVQSDCKAHSKTCGTKEYRCDCGTLFSRRDSFITHRAFCEALAEETAREVVIPQNQNNNQPNPLLIHQSASHPHHHHQTQPTINVSSSSSSSHNHNIINSLHFDTNNGNTNNSNNSNNHLHTFPMKKEQQSNDHIMNYHHSIIPPWLAPQPHALTSSNPNPSNGGGGGGSLFSLASPAMSATALLQKAAQMGSTKTPPLPPTTAYERSTHNNNL…
	AtIDD12	AT4G02670	402	MFSSHSLSYKLSSLSTEASASSGNNTLSTIQEFSGFHNVISSVCTHTETHKPKKKRGLPGNPDPDAEVIALSPKTLLATNRFVCEICNKGFQRDQNLQLHRRGHNLPWKLKQKNTKEQQKKKVYVCPETNCAHHHPSRALGDLTGIKKHFCRKHGEKKWKCEKCSKFYAVQSDWKAHTKICGTRDYRCDCGTLFSRKDTFITHRAFCDALAEESARLHSTSSSNLTNPNPNFQGHHFMFNKSSSLLFTSSPLFIEPSLSTAALSTPPTAALSATALLQKATSLSSTTFGGGGQTRSIGHHRHLTNVNEFLGVDRVMMTSASSSEYDQLVVDGFTSTWQKADRLTRDFLGLTGHGGHVSVRPGDMLEYAGGVAFPMSAYDTESHDHSFQKAYDHLGFSGA…
	AtIDD13	AT5G60470	455	MTASHSLALSMTKSTSPLILTLTLSLQPPLKHPRKRETFQEIQAYPNAEVISLSPKSLMATNRFFCEICNKGFQREQNLQLHKRGHNLPWKLKQKTNKNQVKKKVYICPEKSCVHHDPARALGDLTGIKKHFSRKHGEKKWKCDKCSKKYAVISDWKAHNKICGSREFRCDCGTLFSRKDSFISHRSFCDVLAEESSKFFSVPSPLAANSTIATVTDTNNPILIQSQLDQSSTGTADLNVNNNHTTLFGQKFTNSNPTQQQPNALALSSPPSPRSTSDSVHNLWKLQEEECAHQWLLNEYMNNNKNIFHKGIFKNQEDEIKKGNIYSGSNPTDGNIASLFSYNQEAVNMASFSATTLLQKVAQTGTPSSSETSTTMFGQMTSSIFNNTMLNSYCLTAKN…
	AtIDD14	AT1G68130	419	MIDYERSNTTKNINTHHHNPPPSSSSSDLLPDGNGTAVTQKRKRRPAGTPDPEAEVVSLSPRTLLESDRYVCEICNQGFQRDQNLQMHRRRHKVPWKLLKRETNEEVRKRVYVCHHNPCHALGDLVGIKKHFRRKHSNHKQWICERCSKGYAVQSDYKAHLKTCGTRGHSCDCGRVFSRVESFIEHQDTCTVRRSQPSNHRLHEQQQHTTNATQTASTAENNENGDLSIGPILPGHPLQRRQSPPSEQQPSTLLYPFVTNGSIELQLLPSRNCADETSLSLSIGTMDQKTMSEVEKKSYEKGETSLEREEARRETKRQIEIAELEFAEAKRIRQHARAELHKAHLFREEASRRISATMMQITCHNCKQHFQAPAALVPPPPQTHCTDESTSLAVSYMSS…
	AtIDD15	AT2G01940	439	MRTDQVMLSNKNTNTCCVVSSSSSDPFLSSSENGVTTTNTSTQKRKRRPAGTPDPDAEVVSLSPRTLLESDRYICEICNQGFQRDQNLQMHRRRHKVPWKLLKRDNNIEVKKRVYVCTCLHHNPCHALGDLVGIKKHFRRKHSNHKQWVCERCSKGYAVQSDYKAHLKTCGTRGHSCDCGRVFSRVESFIEHQDNCSARRVHREPPRPPQTAVTVPACSSRTASTVSTPSSETNYGGTVAVTTPQPLEGRPIHQRISSSILTNSSNNLNLELQLLPLSSNQNPNQENQQQKVKEPSHHHNHNHDTTNLNLSIAPSSSYQHYNNFDRIKEIMASEQIMKIAMKEKAYAEEAKREAKRQREIAENEFANAKKIRQKAQAELERAKFLKEQSMKKISSTIMQ…
	AtIDD16	AT1G25250	385	MELTQPIRENGDPQGHQLTDPDAEVVSLSPRTLLESDRYVCEICNQGFQRDQNLQMHRRRHKVPWKLLKRDKKDEEVRKRVYVCERCSKGYAVQSDYKAHLKTCGSRGHSCDCGRVFSRVESFIEHQDTCTIRQPQPTNHRHLQQHTMGLDAPSRTTSTASFGPLLHGLPLLRPPRPSNQHSPAFAYPFNASSAPFESLELQLSIGMARTSAQARHNEKRETSLTKERANEEARKAEETRQEAKRQIEMAEKDFEKAKRIREEAKTELEKAHVVREEAIKRINATMMEITCHSCKQLFQLPVTADESTSSLVMSYVSSATTEGECE
Oryza sativa	RID1	Os10g0419200	409	MLLSDLSSDQEATGSNSHGGGGGDRMVVGSHGAAHVVLSNLFLPPAAAAAATMLLPAAPVMVRPAAMAAAQEPRAKKKRSLPGNPDPEAEVIALSPRALVATNRFVCEVCNKGFQRDQNLQLHRRGHNLPWKLRHRAAAVSAVTTAAPAPRKRVYVCFSRKHGEKRWRCERCGKRYAVHSDWKAHVKNCGTREYRCDCGILFSRKDSLLTHRAFCDALAEESARLLAAANNSSSITTTTCNNSNISSNNNNNNINSISNSNNLLITSSSSSPPLFLPFSTTPAENPNPNQLLFLQQHQAAHHQLLLPQFQQPPSSPPAYFDHLAFGGGGGVITGSSCNDDNSSIAGDVMVAAGGDSVSFGLTSEGSVTMHAGDVGRRRLTRDFLGVDHDAGEVDELELD…
	OsIDD1	Os03g0197800	552	MEVETSSGTAERGAGAGAQQQPPPQPQPQPPAKKKRALPGMPDPDAEVIALSPKTLLATNRFVCEICNKGFQRDQNLQLHRRGHNLPWKLRQRSGKEVRKRVYVCPEPTCVHHDPSRALGDLTGIKKHFCRKHGEKKWKCDKCSKKYAVQSDWKAHTKTCGSREYRCDCGTLFSRRDSFITHRAFCDALAEESAKARAAPPPPADEDGTSASAGAPPPQAPLPPPAPVPAPAPPPPPAAAPAPAAQPEQRDRDAALDQFATPAPAPAPPPVTAPPPPPVAAPNDCVSSSSSGVAPTSQSLLSSMFAPPSVAQAPQYADPIGVGAGGHQERAVPAKPPALCLAPNASSSLFTAPVPADRQQFAPPPPPSPSPHMSATALLQKAAQMGATSSSSSFLRCLG…
	OsIDD2	Os01g0195000	487	MMLKDLAEIQQQQLLAAAEENMSNLTSASGDQASVSSHPAPPPAKKKRSLPGNPDPEAEVIALSPRTLMATNRYVCEICGKGFQRDQNLQLHRRGHNLPWKLKQRNPKEVVRKKVYVCPEAGCVHHDPARALGDLTGIKKHFSRKHGEKKWKCDKCSKRYAVHSDWKAHSKVCGTREYRCDCGTLFSRRDSFITHRAFCDALAEESARAVTAAAAVAGQQQHGGGMLFSQVADVLDHQAAMAMGGHGLMQELCLKREQQQQQQQFAPSWLTAQQQQQQLEAMAGAGNPAAMYGSARLDQEFIGSSTPESGGAQQAGLSFGFSSTSSAPPHPAASSAHMSATALLQKAAQMGATLSRPSSHAHMAAAAAASTHNSSSSAATTNAPPPPPTSNVSSTCVGA…
	OsIDD3	Os09g0555700	535	MAAASSAPFFGLGDTQMPPPQNPTNPALHHHPNPSPAPVAAAAPAPKKKRNQPGNPNPDAEVIALSPRTLMATNRFVCEVCNKGFQREQNLQLHRRGHNLPWKLKQKNPKEARRRVYLCPEPSCVHHDPSRALGDLTGIKKHYCRKHGEKKWRCDKCSKRYAVQSDWKAHSKTCGTREYRCDCGTLFSRRDSFITHRAFCDALAQENARMPPIGAGVYGGAGNMTLGLTGMAAPQLPAGFPDQAGQPSASAGDVLRLGGGSNGASQFDHLMASSSGSSMFRSQGSSSSSFYLANGAAHHAPAQDFGPEDGQSQAGQGSLLHGKPAAFHDLMQLPVQHQQSGNGNLLNLGFFSGSNGGVDQFNGGAGNGGQGSIVTSSGLAGNHGGGGGGFPSLYNSSEP…
	OsIDD4	Os02g0672100	615	MASNSSAAAVAALFGIRDGDHEDQIKPLFAQQQQHHHHQPPMAPSNAAAAASAAGSAAGQAAVAAPPAKKKRTLPDPDAEVIALSPKTLLATNRFVCEVCNKGFQREQNLQLHRRGHNLPWKLKQKNPLQAQRRRVYLCYAVQSDWKAHSKICGTREYRCDCGTLFSRRDSFITHRAFCDALAQESARLPPAAAGHLYGSAGAANMALSLSQVGSHLASTLQDHGHHHHHHGASPDLLRFGGSGGGAMAARLEHLLSSSSASAFRPLPPPQQQPPAPFLLGAAPQGFGDGGDGSGPHGFLQGKPFHGLMQLPDLQGNGTGGPSPSGPGLYNLGYIANSANSSGTSSHGHASQGQMTNTDQFSEGGGGGGGGGGSETSAAALFGAGGNFSGGDHHQVSPA…
	OsIDD5	Os07g0581366	633	GGWSCGGGRSRGDATQSDGDGGGARAGGGAGSGGGGGGAGDPDAEVIALSPGTLLATNRFVCEVCGKGFQRDQNLQLHRRGHNLPWRLRQRGPGAAPPRRRVYVCPEPGCVHHNPTRALGDLTGIKKHFCRKHGEKRWTCQRCGKRYAVQADLKAHTKTCGTREYRCDCGTLFTRRDSFVTHRAFCGALVEETGRVLAVPAPPSPRPPDLEAEENVDKDKDKEEEVKEKEKEKELEENEDSPVAEVDEPQPSQAVAEVPQQCAPSPPPPPPILQEHPQPVVAVVPNVDEQEVVAKPAVIAKIEVEDERDEEVCFQEVDRYKDAELEDSNLLDNDTPMLPCFLPSPSEAIGTDGSSTSCGTGSSVTNAIAPATTTSTFAGLFASVTTSSTPQSRSLRDLI…
	OsIDD6	Os08g0554400	552	MAAASSAHYFGLGEPQMQQQQQQPPLQNNAAAPVAATPPPKKKRNQPGNPNPDAEVVALSPHTLLATNRFVCEVCNKGFQREQNLQLHRRGHNLPWKLKQKNPKETRRRVYLCHDPSRALGDLTGIKKHYSRKHGEKKWKCDKCNKRYAVQSDWKAHSKTCGTREYRCDCGTLFSRRDSFITHRAFCDALAQESGRIMPPMGAALYAAAGAGMAIGGLTGMAASHQLQPFQDHSSAITTAANAAAQFDHLMATSSAAAGSPAFRAAQPTSSSSSPFYLGGGGDDGQAHTSLLHGKPAFHGLMQLPEQQGSNGGGLLNLSYFSGGNGGHHHHHQEGRLVFPDQFNGVAAGNGARAGSGEHGNSGNNADSGSIFSGNMMGGGGGFSSLYSSSDQTVPPPQM…
	OsIDD7	Os02g0518500	492	MSHTSEEESLNNLQQQPKLEACAAGSSKGDTVMPVVKKRRGHPGNPDPDVEVVALSPKTLLATNRYICEVCHKGFQRDQNLQLHRRGHNLPWKLKQRSSTEAKKKVYVCPEITCPHHDATRALGDLTGIKKHYSRKHGEKKWKCDRCSKKYAVQSDWKAHTKICGTKEYRCDCGTIFSRKDSFITHRAFCDALAEDTSRVNHSLATMVGSLHGQQQDMFSHGVPSFSSSPTDMIANLASNDHNSDSHLRSLSPYALVTRNTTLFSNQISPKESGFPLDGSVTSYPYMSMNSPYMSATALLQKAAEMGAKTSQDPISPLLLKSFPNNLTSSRDHMNISSRSQGDSLGNSTVNSDCMKTTEDENSYMIGRGNILINAPWSSGIMRPGTVPLIGLMNHPFSM…
	OsIDD8	Os01g0242200	495	MATSEAAAISNPFAPLTNHQQEHPPPPPPPAKKKRNLPGTPDPEAEVIALSPRTLMATNRFVCEICGKGFQRDQNLQLHRRGHNLPWKLRQRSGKEPRKRVYVCPEKSCVHHNPSRALGDLTGIKKHFCRKHGEKKWKCDKCSKRYAVQSDWKAHSKTCGTREYRCDCGTLFSRRDSFITHRAFCDALAEETARLNAASGAAAAAAAATATSLCGQSYLFAGSGGPGMAGMRPNMMMPPQFDAAQLSWLYGNGKLSSSNASELTSATAAAKEAESVPSVFSNQQHAKPAAPTDMSATALLQKAAQIGAVTSTAAMPLVSPFEPTKPGGATASPADECGKFDGAALFAAASHHNANLGGAMSELTGAAGNVPYDVLSAVRHHAGLKDAGGVGREETRDFL…
	OsIDD9	Os01g0935000	476	MEEFELQQQPYYSKLLLGSPLEIANVDDSDLQLVAGVPSDPPPAPPTAVKKKKKRSLPGTPDPSAEVVALSPRTLLATNRFVCEICGKGFQRDQNLQLHRRGHNLPWKLRQRGGAGGGGGGEPPRKRVYVCPEASCVHHSPSRALGDLTGIKKHFCRKHGEKKWKCDRCGKRYAVHSDWKAHSKVCGTREYKCDCGTVFSRRDSFVTHRAFCDALAQENNKLAQPMNMAAVTSALQGQQQAHHPVADDDDAAGVKSPHLKMFPDVDNIVAAATAGNPLLPPPLSMAGCMLSSLAAPLSSPFLPGCKLGVDAARDAAMVFPPPPPPAGSAAAIMSATALLQKAAELGATTSTGCYGGVAFPAMGIAGGLDRLPAIGHHLAPYDDVVVPAALQGQTATQLV…
	OsIDD10	Os04g0566400	613	MASNSSAAAAAAFFGISRDGDQHDQIKPLISHQQHQHQQQQLAASLTGVATAAPTAASSQGAPPAAPPAKKKRNLPADPDAEVIALSPKTLLATNRFVCEVCNKGFQREQNLQLHRRGHNLPWKLKQKNPAQAQRRRVYLCKRYAVQSDWKAHSKICGTREYRCDCGTLFSRRDSFITHRAFCDALAQESSRLPPTSLSSLTSHLYGASNAGNMALSLSQVGSHLTTSLQDGGGHHHHPSPELLRLGGAGGGGGAGGGSSIAARLDHLLSPSGASAFRPPQPAFFLNAAAAAAATGQDFGDDAGNGQHSFLQAKPFHGLMQLPDLQGNGAGGPGAPGPNLFNLGFFANNGNSSGSSHEHASQGLMSNDQFSCGAGGGGGLTRRRRGSPAVTSLVATMFL…
	OsIDD11	Os01g0572300	537	MFHHHLQQQQQQEEEEGGGLFLVEEAAEAADQQQESSMSNLTSSASTVPPPPPPSSGNNGNNSNKRKRSLPGNPDPEAEVVALSPATLMATNRFVCEICGKGFQRDQNLQLHRRGHNLPWKLKQRGSKEAVRKKVYICPEASCVHHDPSRALGDLTGIKKHFFRKHGEKKWKCDKCSKKYAVHSDWKAHSKICGTREYKCDCGTIFSRRDSFITHRAFCDALTEESAKAIGGIPAAMAAPGHHHHHHHHHHQLLFSPPPVMAHHQELAALQEQQQQQHHQDVMQSPHQHQQQQQQRQQLVQQNCGYAVKPEMAPWPTTMPYDHHHPLLQPLCNANAAATAQSSATSAPPTTPQLPAAAAAAHLSATALLQKAAQMGATIGGAGTGAAGAHYAHMASPAG…
	OsIDD12	Os08g0467100	533	MLSSCAPTAVPPQDASGAATEPFRSLQIATAGAAAKKKRRPAGTPDPDAEVVSLSPRTLLESDRYVCEICNQGFQRDQNLQMHRRRHKVPWKLLKREAGEAARKRVFVCHALGDLVGIKKHFRRKHSGHRQWACSRCSKAYAVHSDYKAHLKTCGTRGHTCDCGRVFSRVESFIEHQDACNAGRPRAAEASSSPGRGGGVVVGAPAAASSSQQQQLFAVPASLSRTASSASPSSDLVVSPVAWPATGGGGPAMVSPRAAAPAPAGGSIAAFHHRFTDPALSPPTPCGGRRGGCHTTHSLELQLMPPRTTTTCAGGSLGGTPVATAVGYYASSSPHSPAAALPSRQPVADAMRLQLSIGFGGARDDGNNNSSSSSGEVSASATRLKEAAHEQLRLAMAEK…
	OsIDD13	Os09g0449400	504	MLGSCAPTTAGPPPDEATTPEPFRSLQIATASAGSAKKKRRPAGTPDPDAEVVSLSPRTLLESDRYVCEICNQGFQRDQNLQMHRRRHKVPWKLLKREAGEAARKRVFVCPEPTCLHHDPSHALGDLVGIKKHFRRKHSGHRQWACARCSKAYAVHSDYKAHLKTCGTRGHSCDCGRVFSRVESFIEHQDTCNASRGQAAAVAEGGNVSTAACGGVAVLEQEKQLDLQAPAAASLSRTASSTSPSSDVVASPVAWPGAGAPSMPSPKAAAFRGRFDMAPSPPPPSYDHYRGGAGAHNLELQLMPPFNAGGAAAAPGGMGACFYAAAHQHHPTGVSQCNDASTQLQLSIGRDEVMGAAGTSDEASAAATAKEQAREQLRQAMAEKEAAGEARAQARRQVE…
	OsIDD14	Os03g0237250	468	MALVKSHHQMLASSSTSSSSPSSQQQQPPPPASNSSSLAAAAADQPSPAKRKRRPPGTPDPDAEVVALSPRTLLESDRYVCEICGQGFQREQNLQMHRRRHKVPWRLVKRPAAATAAEDGGAAGGGGGAGGGAGGGGARKRVFVCCARCAKGYAVQSDYKAHLKTCGTRGHSCDCGRVFSRVESFIEHQDACNSGRVRGEVVPVATTLPVIRPAALRHHHHHPPPPPPELQLLPASTTAPLAAAFSSNSTTTGSSSHEQHATTMTTTKLQLSIGPAAVVAAASGGGGACAAAAGGEEEQQREEVRRALEEKTAADAARERAREEAAAAERALEDARRARHRARGELEKALALRDHAARLIAQVTCHACRQRSLAVMSMAAIDGHGASAVAREHLRGGGV…

## Sheet: S4
Table S4. Conserved amino acid motifs and annotation of the IDD genes identified in Zea mays.
No.	E-value	Width	Best possible match	Annotation
1	2.6e-981	41	EVIALSPRTLLATNRFVCEVCGKGFQRDQNLQMHRRGHNLP	C2H2-type zinc finger
2	1.7e-602	28	WKCDRCSKRYAVQSDWKAHSKTCGTREY	No
3	1.3e-420	29	CDCGTLFSRRDSFITHRAFCDALAEESAR	No
4	2.6e-395	21	RALGDLTGIKKHYCRKHGEKK	No
5	2.5e-190	21	KEPRKRVYVCPEPTCVHHDPS	No
6	6.1e-146	28	AASAHMSATALLQKAAQMGATTSSSGYS	No
7	6e-84	15	AKKKRSLPGTPDPDA	No
8	5.4e-68	66	AREQLRQAVAEKAAADEARAQARRQAELAERELAEARRMRQQAQAELERAHALRDHAVRQVBATLL	No

## Sheet: S5
Table S5 Syntenic blocks and Ka/Ks values of IDD genes in Zea mays.
Gene in the synteny region		Gene ID		Method	Ka	Ks	Ka/Ks	P-Value(Fisher)	S-Sites	N-Sites	Divergence-Time(MYA)
Gene1	Gene2	Gene1	Gene2
ZmIDD2	ZmIDD21	Zm00001d028361	Zm00001d047976	MA	0.0482221	0.20363	0.236813	2.44991e-12	246.403	1031.6	6.78767
ZmIDD6	ZmIDD3	Zm00001d005871	Zm00001d031759	MA	0.423093	3.36303	0.125807	0	244.312	1024.69	112.101
ZmIDD15	ZmIDD3	Zm00001d020683	Zm00001d031759	MA	1.03265	0.933334	1.10641	0.00292423	459.613	938.387	31.1111
ZmIDD6	ZmIDD15	Zm00001d005871	Zm00001d020683	MA	0.049579	0.220487	0.224862	2.48993e-13	228.572	1058.43	7.34957
ZmIDD7	ZmIDD16	Zm00001d002654	Zm00001d021403	MA	0.138512	0.456419	0.303475	1.13656e-19	224.214	1113.79	15.214
ZmIDD8	ZmIDD17	Zm00001d006682	Zm00001d021932	MA	0.0813479	0.269783	0.301532	2.65224e-21	490.892	1618.11	8.99277
ZmIDD19	ZmIDD9	Zm00001d009030	Zm00001d039254	MA	0.0776991	0.248288	0.312939	1.89293e-09	190.205	832.795	8.27627
ZmIDD20	ZmIDD12	Zm00001d011223	Zm00001d044261	MA	0.0556212	0.33422	0.166421	3.03571e-21	183.007	1151.99	11.1407

## Sheet: S6
Table S6 One-to-one orthologous relationships of the IDD genes between Zea mays and Oraza sativa.
Gene Name		Gene ID
Zea mays	Oraza sativa	Zea mays	Oraza sativa
ZmIDD13	OsIDD9	Zm00001d016632	Os02t0518500
ZmIDD1	OsIDD9	Zm00001d028139	Os03t0197800
ZmIDD17	OsIDD11	Zm00001d021932	Os07t0581366

## Sheet: S7
Table S7 Promoter element analysis of maize IDD genes.
Gene Name	Gene ID	ABRE	AuxRR-core	MBS	TCA-element	TC-rich repeats	LTR
ZmIDD1	Zm00001d028139	√	√	×	×	×	×
ZmIDD2	Zm00001d028361	×	√	√	×	×	×
ZmIDD3	Zm00001d031759	√	×	√	√	×	×
ZmIDD4	Zm00001d031992	√	×	×	×	×	×
ZmIDD5	Zm00001d032922	√	×	√	√	×	×
ZmIDD6	Zm00001d005871	×	√	√	×	×	×
ZmIDD7	Zm00001d002654	√	√	√	×	×	×
ZmIDD8	Zm00001d006682	√	×	√	×	√	√
ZmIDD9	Zm00001d039254	×	√	×	×	×	×
ZmIDD10	Zm00001d039467	×	×	√	×	×	×
ZmIDD11	Zm00001d042202	√	×	×	×	√	×
ZmIDD12	Zm00001d044261	√	×	√	×	×	×
ZmIDD13	Zm00001d016632	√	√	√	×	×	√
ZmIDD14	Zm00001d017560	√	×	×	×	√	×
ZmIDD15	Zm00001d020683	×	√	×	×	×	×
ZmIDD16	Zm00001d021403	√	×	×	√	×	×
ZmIDD17	Zm00001d021932	√	×	×	√	×	×
ZmIDD18	Zm00001d008842	√	×	√		×	×
ZmIDD19	Zm00001d009030	×	×	√	√	×	×
ZmIDD20	Zm00001d011223	√	×	×	×	×	√
ZmIDD21	Zm00001d047976	×	×	×	√	×	×
ZmIDD22	Zm00001d026113	√	×	√	×	×	√
ABRE	cis-acting element involved in the abscisic acid responsiveness
AuxRR-core	cis-acting regulatory element involved in auxin responsiveness
MBS	MYB binding site involved in drought-inducibility
TCA-element	cis-acting element involved in salicylic acid responsiveness
TC-rich repeats	cis-acting element involved in defense and stress responsiveness
LTR	cis-acting element involved in low-temperature responsiveness

## Sheet: S8
Table S8 The expression profiles (log2-TPM+1) of the IDD genes in different tissues of Zea mays.
Gene Name	Gene ID	Root	Stem	Leaves	Endosperm	Pericarp	Embryo
ZmIDD1	Zm00001d028139	0.584963	0.847997	0.137504	0.378512	1.80735	1.53605
ZmIDD2	Zm00001d028361	0.847997	1.26303	0	0	0	0.263034
ZmIDD3	Zm00001d031759	0.584963	0.584963	0.263034	0	0.137504	0.765535
ZmIDD4	Zm00001d031992	1.76553	2.43296	2.58496	0.263034	0.678072	2.40599
ZmIDD5	Zm00001d032922	0	0.378512	0.765535	0.137504	0.137504	0.263034
ZmIDD6	Zm00001d005871	0.678072	0.584963	0	0	0.137504	0.263034
ZmIDD7	Zm00001d002654	0	0	0	4.73335	1.26303	0.137504
ZmIDD8	Zm00001d006682	2.03562	1.67807	1.20163	1.26303	1.67807	2.10434
ZmIDD9	Zm00001d039254	0	0	0	0	0	0
ZmIDD10	Zm00001d039467	2	1.80735	0.584963	0	0.485427	1.63227
ZmIDD11	Zm00001d042202	0.378512	0.378512	0	0	0	1.1375
ZmIDD12	Zm00001d044261	3.01792	3.26303	2.1375	0.137504	1.26303	0.584963
ZmIDD13	Zm00001d016632	0.137504	0	0	0	0	0
ZmIDD14	Zm00001d017560	2.53605	1.96347	2.76553	3.70044	3.21723	3.33628
ZmIDD15	Zm00001d020683	0.847997	1.07039	0	0	0.137504	1.32193
ZmIDD16	Zm00001d021403	1.20163	2.7866	3.52356	1	0.263034	1.63227
ZmIDD17	Zm00001d021932	2.51096	2.3505	1.1375	1.63227	2.29278	1.63227
ZmIDD18	Zm00001d008842	1.63227	1.07039	0.584963	0.485427	0.378512	0.847997
ZmIDD19	Zm00001d009030	0.584963	0.678072	0	0	0	0.378512
ZmIDD20	Zm00001d011223	2.03562	2.16993	0.485427	0.378512	2.63227	1.07039
ZmIDD21	Zm00001d047976	0.847997	0.678072	0.137504	0	0.137504	0.485427
ZmIDD22	Zm00001d026113	1.1375	1.43296	2.56071	4.3147	1.58496	3.12102

## Sheet: S9
Table S9 The expression profiles (log2 ratio to control) of the IDD genes in Zea mays under different abiotic stresses.
Gene Name	Gene ID	Drought	Heat	Salt	UV	Cold
ZmIDD1	Zm00001d028139	0.241008	-2.41504	0.395851	-0.152484	0.392317
ZmIDD2	Zm00001d028361	-0.893085	-2.58496	-0.905845	-0.212373	0.152003
ZmIDD3	Zm00001d031759	0.222392	-1.37851	-0.670593	0.251987	-1.11548
ZmIDD4	Zm00001d031992	-0.807355	-0.422233	-0.137927	-1.25314	0.0213737
ZmIDD5	Zm00001d032922	0	-3.32193	-0.995372	0.457142	-2.09954
ZmIDD6	Zm00001d005871	-1	0	0	0.634341	-1.80735
ZmIDD7	Zm00001d002654	0	0	0	0	0
ZmIDD8	Zm00001d006682	-0.203533	-1.75002	1.29698	-1.45739	0.545434
ZmIDD9	Zm00001d039254	0	0	0	0	0
ZmIDD10	Zm00001d039467	-0.125531	0.447459	0.188562	0.283103	-0.371969
ZmIDD11	Zm00001d042202	-1.58496	0	0	0	0
ZmIDD12	Zm00001d044261	-0.0861566	-1.4498	0.0208831	0.503739	-0.331621
ZmIDD13	Zm00001d016632	0	0	0	0	0
ZmIDD14	Zm00001d017560	-0.0565835	-1.074	-0.455089	-0.305305	0.0531113
ZmIDD15	Zm00001d020683	0.415037	-2.80735	-2.72333	-0.252221	-1.80735
ZmIDD16	Zm00001d021403	-0.108934	-0.979241	-1.05843	-1.66903	-0.250543
ZmIDD17	Zm00001d021932	0.61471	-2.11548	-0.298395	1.06691	-0.378512
ZmIDD18	Zm00001d008842	0.234465	-1.58496	0.619382	-0.951057	-1
ZmIDD19	Zm00001d009030	0	0	0.17802	0	0
ZmIDD20	Zm00001d011223	0	-1.20645	-0.444838	-0.304392	0.378512
ZmIDD21	Zm00001d047976	-0.530515	-0.584963	0.218169	-1.08643	1.9386
ZmIDD22	Zm00001d026113	-0.874469	-0.616671	-1.28406	-1.05401	0.213404

## Sheet: S10
Table S10. The list of ZmIDDs target genes in Zea mays.
TF	Target	Method	Position	Strand	Sequence	DistanceToTSS	P-value	Correlation	NCBI Annotation
ZmIDD1	AC190883.2_FG005	FunTFBS	3:200267027-200267043	-	TAGTTAACGACAAAAAT	-387	1.72e-07	0.553
ZmIDD1	AC203253.4_FG001	FunTFBS	3:151635785-151635801	+	CATTAAATGACAAAAAA	-360	1.03e-06	0.6095
ZmIDD1	AC209819.3_FG003	FunTFBS	8:122537126-122537142	-	AATAAATAGACAAAAAA	-123	3.13e-06	0.5372
ZmIDD1	GRMZM2G004259	FunTFBS	1:21455733-21455749	+	TTTAAAATGACAAAATT	-331	6.78e-06	0.5686	uncharacterized LOC100282391
ZmIDD1	GRMZM2G017186	FunTFBS	1:276389829-276389845	+	AACAAGAAGACAACATT	41	9.43e-06	0.5311	uncharacterized LOC541703
ZmIDD1	GRMZM2G027049	FunTFBS	2:24336812-24336828	-	ACGAATAAGACAAAACA	38	1.02e-06	0.5736	WD repeat-containing protein 44
ZmIDD1	GRMZM2G041350	FunTFBS	10:88630243-88630259	+	AAAAAGAAGACAAAAAG	-96	4.28e-07	0.5259
ZmIDD1	GRMZM2G043117	FunTFBS	8:146281038-146281054	-	TGAAATAAGACAAATAG	-256	6.83e-06	0.6416	plant-specific domain TIGR01570 family protein
ZmIDD1	GRMZM2G045706	FunTFBS	2:167841963-167841979	-	TCGAATAAGACAAGAAT	-259	9.77e-06	0.5465	thiol protease SEN102
ZmIDD1	GRMZM2G053934	FunTFBS	4:224578929-224578945	-	AAATAAAAAACAAAAAT	-213	9.37e-06	0.5346	AAA-type ATPase family protein / ankyrin repeat family protein
ZmIDD1	GRMZM2G057067	FunTFBS	3:199380387-199380403	+	CGCGAAAAGACAAAAAG	-166	1.24e-06	0.5406	uncharacterized LOC100283620
ZmIDD1	GRMZM2G057369	FunTFBS	6:163209276-163209292	-	AGATATAAGACAAAACA	-401	2.35e-06	0.5331	uncharacterized LOC100283736
ZmIDD1	GRMZM2G064537	FunTFBS	4:176377593-176377609	+	GGAAAAAAGACAAAAAT	-66	2.2e-07	0.6215	chaperone protein DnaJ
ZmIDD1	GRMZM2G069284	FunTFBS	1:234647304-234647320	-	GCGGAAAAGACAAAACC	-426	9.11e-06	0.5387
ZmIDD1	GRMZM2G077541	FunTFBS	2:2330909-2330925	+	AGAAAGAAGACAAACGA	-49	8.01e-06	0.5012	LOC100280536 YLS5
ZmIDD1	GRMZM2G079908	FunTFBS	10:76415760-76415776	-	AGGAAAAGGACAAAATT	-129	2.93e-07	0.5613	LOC100193362 acyl-CoA-binding protein
ZmIDD1	GRMZM2G087103	FunTFBS	3:1482927-1482943	+	CCCCAAACGACAAAAGA	-30	3.6e-06	0.5957	LOC100192017 uncharacterized LOC100192017
ZmIDD1	GRMZM2G094388	FunTFBS	1:45446331-45446347	+	TATAAAATGACAAACAT	-190	6.15e-06	0.5917	ran-binding protein 1
ZmIDD1	GRMZM2G097342	FunTFBS	1:219283287-219283303	+	GTGAAAAGGACAAAACG	-276	4.76e-06	0.5312	uncharacterized LOC100278604
ZmIDD1	GRMZM2G097662	FunTFBS	10:106862724-106862740	+	AGGAAGAAGACAAATTT	62	3.6e-06	0.5687	uncharacterized LOC100280214
ZmIDD1	GRMZM2G118579	FunTFBS	4:169831243-169831259	-	GAAATCAAGACAAAATA	-340	7.24e-06	0.5613	putative xyloglucan endotransglucosylase/hydrolase protein 32
ZmIDD1	GRMZM2G124434	FunTFBS	1:240922084-240922100	+	GCAAAAGAGACAAAAAA	-100	5.84e-06	0.5226	GDP-mannose 3,5-epimerase 1
ZmIDD1	GRMZM2G128807	FunTFBS	5:62291819-62291835	+	CACAATACAACAAAAAC	-202	8.79e-06	0.524	uncharacterized LOC100274388
ZmIDD1	GRMZM2G140924	FunTFBS	10:140501470-140501486	+	GAAAAGCAGACAAAAAA	-310	4.26e-06	0.5997	zinc finger, C3HC4 type family protein
ZmIDD1	GRMZM2G141320	FunTFBS	1:187704236-187704252	-	AGGTTACCGACAAAAAC	-414	9.7e-06	0.9405	Monogalactosyldiacylglycerol synthase 2 chloroplastic
ZmIDD1	GRMZM2G144282	FunTFBS	5:71751173-71751189	+	AATATAACGACAAAGAT	-171	2.3e-06	0.8571	eukaryotic translation initiation factor 3 subunit 1 alpha, 35kDa
ZmIDD1	GRMZM2G150386	FunTFBS	1:297391178-297391194	-	GAGTAAACAACAAAAAT	-266	6.93e-06	0.6433
ZmIDD1	GRMZM2G164714	FunTFBS	10:132032932-132032948	-	TATATAAAGACAAGATA	-484	9.91e-06	0.5642	Phosphoenolpyruvate carboxylase family protein
ZmIDD1	GRMZM2G164743	FunTFBS	10:132032932-132032948	-	TATATAAAGACAAGATA	-112	9.91e-06	0.5642	putative sphingolipid transporter spinster homolog 2
ZmIDD1	GRMZM2G180947	FunTFBS	2:211052377-211052393	-	GGAAAACAGACAAAACA	-273	6.34e-06	0.5859	nuclear transcription factor Y subunit B-10
ZmIDD1	GRMZM2G329999	FunTFBS	5:56940232-56940248	-	AAATTAATGACAAAAAA	-135	3.29e-06	0.7871
ZmIDD1	GRMZM2G337143	FunTFBS	10:88630243-88630259	+	AAAAAGAAGACAAAAAG	-312	4.28e-07	0.5259	uncharacterized LOC100280384
ZmIDD1	GRMZM2G392116	FunTFBS	10:147291955-147291971	-	AATAATCGGACAAAAAA	-129	5.93e-06	0.7199	uncharacterized LOC100280252
ZmIDD1	GRMZM2G417682	FunTFBS	4:169831243-169831259	-	GAAATCAAGACAAAATA	-56	7.24e-06	0.5613	DUF2146 family protein
ZmIDD1	GRMZM2G423229	FunTFBS	6:112980661-112980677	+	AAAAAAACAACAAAAGA	-316	4.3e-06	0.5074	Sphinganine C4-monooxygenase 1
ZmIDD1	GRMZM5G827218	FunTFBS	1:211450534-211450550	-	CAAAACACGACAAACCT	10	5.26e-06	0.5558
ZmIDD1	GRMZM5G834286	FunTFBS	8:58992191-58992207	+	GACAAATGGACAAAAAA	-234	6.78e-06	0.5022
ZmIDD1	GRMZM5G857708	FunTFBS	9:147332931-147332947	-	GTGAACAAGACAAAAAC	-29	6.44e-06	0.5072	DExH-box ATP-dependent RNA helicase DExH14
ZmIDD1	GRMZM5G879235	FunTFBS	Pt:77673-77689	-	TAAAATATGACAAAAGC	-484	9.63e-06	0.5182
ZmIDD1	GRMZM5G883149	FunTFBS	8:116390286-116390302	-	AGCAATAAGACAAAATT	-296	7.51e-07	0.5191	uncharacterized LOC100274110
ZmIDD1	GRMZM6G112751	FunTFBS	6:112980661-112980677	+	AAAAAAACAACAAAAGA	-112	4.3e-06	0.5074	Sphinganine C4-monooxygenase 1
ZmIDD4	AC190883.2_FG005	FunTFBS	3:200267027-200267043	-	TAGTTAACGACAAAAAT	-387	1.85e-07	0.5042
ZmIDD4	AC203253.4_FG001	FunTFBS	3:151635785-151635801	+	CATTAAATGACAAAAAA	-360	7.03e-07	0.6108
ZmIDD4	AC209819.3_FG003	FunTFBS	8:122537126-122537142	-	AATAAATAGACAAAAAA	-123	3.64e-06	0.5032
ZmIDD4	GRMZM2G017186	FunTFBS	1:276389829-276389845	+	AACAAGAAGACAACATT	41	2.33e-06	0.5081	uncharacterized LOC541703
ZmIDD4	GRMZM2G022283	FunTFBS	10:37545881-37545897	-	AGGAAGAGGACAAATGG	41	8.67e-06	0.5268	adenylylsulfatase HINT3
ZmIDD4	GRMZM2G026956	FunTFBS	5:192203580-192203596	+	AATTAAAAAACAAAATT	-442	7e-06	0.8815	Expansin-B4
ZmIDD4	GRMZM2G035899	FunTFBS	10:102309673-102309689	+	AAAATAAAAACAAAATT	-312	9.55e-06	0.8318	uncharacterized LOC100276255
ZmIDD4	GRMZM2G036436	FunTFBS	6:134074287-134074303	+	TGGAAAACGACAACGTA	-305	7.63e-06	0.5447	uncharacterized LOC100275681
ZmIDD4	GRMZM2G041350	FunTFBS	10:88630243-88630259	+	AAAAAGAAGACAAAAAG	-96	6.32e-07	0.529
ZmIDD4	GRMZM2G046532	FunTFBS	7:24164269-24164285	+	AAAAAAAAGACAAAAGA	-293	1.37e-07	0.5457	uncharacterized LOC100281766
ZmIDD4	GRMZM2G053934	FunTFBS	4:224578929-224578945	-	AAATAAAAAACAAAAAT	-213	3.37e-06	0.5356	AAA-type ATPase family protein / ankyrin repeat family protein
ZmIDD4	GRMZM2G057067	FunTFBS	3:199380387-199380403	+	CGCGAAAAGACAAAAAG	-166	1.31e-06	0.5365	uncharacterized LOC100283620
ZmIDD4	GRMZM2G062591	FunTFBS	4:37357677-37357693	+	AATAAAAAGCCAAAACT	-13	6.17e-06	0.5962
ZmIDD4	GRMZM2G064537	FunTFBS	4:176377593-176377609	+	GGAAAAAAGACAAAAAT	-66	5.17e-07	0.6609	chaperone protein DnaJ
ZmIDD4	GRMZM2G064628	FunTFBS	7:110809071-110809087	+	AACAAAACACCAAAAAT	33	5.57e-06	0.5553	uncharacterized LOC100501452
ZmIDD4	GRMZM2G079908	FunTFBS	10:76415760-76415776	-	AGGAAAAGGACAAAATT	-129	9.91e-08	0.5816	acyl-CoA-binding protein
ZmIDD4	GRMZM2G084825	FunTFBS	1:110955177-110955193	-	TTAATAAAGACAAAATA	-257	9.3e-06	0.5353
ZmIDD4	GRMZM2G094388	FunTFBS	1:45446331-45446347	+	TATAAAATGACAAACAT	-190	7.1e-06	0.5779	ran-binding protein 1
ZmIDD4	GRMZM2G097662	FunTFBS	10:106862724-106862740	+	AGGAAGAAGACAAATTT	62	1.25e-06	0.5571	uncharacterized LOC100280214
ZmIDD4	GRMZM2G108149	FunTFBS	9:101890190-101890206	+	CAGAAAACGACAATGCA	-149	6.3e-06	0.6824	uncharacterized LOC100273873
ZmIDD4	GRMZM2G108859	FunTFBS	1:178018869-178018885	+	CATAAACAGACAAACTA	-383	6.76e-06	0.6578	protein SMAX1-LIKE 4
ZmIDD4	GRMZM2G134134	FunTFBS	6:6274570-6274586	+	CGCAAGATGACAAATCA	7	6.08e-06	0.5122
ZmIDD4	GRMZM2G140924	FunTFBS	10:140501470-140501486	+	GAAAAGCAGACAAAAAA	-310	4.98e-06	0.5746	zinc finger, C3HC4 type family protein
ZmIDD4	GRMZM2G141320	FunTFBS	1:187704236-187704252	-	AGGTTACCGACAAAAAC	-414	4.17e-06	0.9268	Monogalactosyldiacylglycerol synthase 2 chloroplastic
ZmIDD4	GRMZM2G144282	FunTFBS	5:71751173-71751189	+	AATATAACGACAAAGAT	-171	1.85e-06	0.8782	eukaryotic translation initiation factor 3 subunit 1 alpha, 35kDa
ZmIDD4	GRMZM2G150386	FunTFBS	1:297391178-297391194	-	GAGTAAACAACAAAAAT	-266	2.05e-06	0.6888
ZmIDD4	GRMZM2G180947	FunTFBS	2:211052377-211052393	-	GGAAAACAGACAAAACA	-273	7.95e-06	0.5997	nuclear transcription factor Y subunit B-10
ZmIDD4	GRMZM2G329999	FunTFBS	5:56940232-56940248	-	AAATTAATGACAAAAAA	-135	2.93e-06	0.7663
ZmIDD4	GRMZM2G337143	FunTFBS	10:88630243-88630259	+	AAAAAGAAGACAAAAAG	-312	6.32e-07	0.529	uncharacterized LOC100280384
ZmIDD4	GRMZM2G359779	FunTFBS	2:80966200-80966216	-	CATAAACAGACAAACTA	-386	6.76e-06	0.7919	protein SMAX1-LIKE 4
ZmIDD4	GRMZM2G423229	FunTFBS	6:112980661-112980677	+	AAAAAAACAACAAAAGA	-316	2.39e-06	0.527	Sphinganine C4-monooxygenase 1
ZmIDD4	GRMZM2G426275	FunTFBS	10:109387985-109388001	+	AATAAAAAGACAAGTTT	-129	6.76e-06	0.633	uncharacterized LOC100274447
ZmIDD4	GRMZM2G703231	FunTFBS	2:165355419-165355435	-	CACAACAAGACAAGTAT	-327	6.08e-06	0.5243	uncharacterized LOC100283831
ZmIDD4	GRMZM5G827218	FunTFBS	1:211450534-211450550	-	CAAAACACGACAAACCT	10	8.25e-06	0.5342
ZmIDD4	GRMZM6G112751	FunTFBS	6:112980661-112980677	+	AAAAAAACAACAAAAGA	-112	2.39e-06	0.527	Sphinganine C4-monooxygenase 1
ZmIDD5	GRMZM2G021642	FunTFBS	1:298516052-298516063	+	TTTCCCCTTCCG	32	2.8e-06	0.6042	uncharacterized LOC100273115
ZmIDD5	GRMZM2G051151	FunTFBS	3:199722017-199722028	-	TTTTCCCTTCCG	-302	1.69e-06	0.627	uncharacterized LOC100275200
ZmIDD5	GRMZM2G092746	FunTFBS	1:290636865-290636876	+	TTTCCTTTCTCG	-428	8.67e-06	0.7907	LOC103644217 polygalacturonase
ZmIDD5	GRMZM2G128935	FunTFBS	7:137198567-137198578	+	TTTTTTTTTTCG	-110	8.15e-06	0.5769	uncharacterized LOC100281822
ZmIDD5	GRMZM2G134426	FunTFBS	9:156547430-156547441	-	TTTCCGTTTTCG	-472	6.43e-06	0.6925	putative amino-acid acetyltransferase NAGS1 chloroplastic
ZmIDD5	GRMZM2G137358	FunTFBS	1:289419271-289419282	-	TTTTCTTTACCG	-480	7.64e-06	0.6004	uncharacterized LOC100284039
ZmIDD5	GRMZM2G162788	FunTFBS	6:120038201-120038212	+	TTTTCCTTTCCG	22	8.46e-07	0.6106	uncharacterized LOC541680
ZmIDD5	GRMZM2G172264	FunTFBS	8:98794261-98794272	-	TTTTCTTTCTCG	-216	5.88e-06	0.6006	NAC domain-containing protein 90
ZmIDD5	GRMZM2G304212	FunTFBS	2:152101906-152101917	+	TTTTCCCTACCG	-39	3.36e-06	0.6479	uncharacterized LOC100274833
ZmIDD5	GRMZM2G310283	FunTFBS	7:167258678-167258689	-	TTTTCCTTTTCG	-374	7.34e-08	0.5779	uncharacterized LOC100280438
ZmIDD5	GRMZM2G318346	FunTFBS	5:3545225-3545236	+	TTGTCCTTCTCG	39	2.32e-06	0.6401	uncharacterized LOC100383274
ZmIDD5	GRMZM2G325008	FunTFBS	7:152427685-152427696	-	TTTTCCTTTCCG	-326	8.46e-07	0.6117	glucan endo-1,3-beta-glucosidase 3
ZmIDD5	GRMZM2G368663	FunTFBS	8:164455841-164455852	+	TTTTTCTTTGCG	-51	4.65e-06	0.6896	uncharacterized LOC109939377
ZmIDD5	GRMZM2G376918	FunTFBS	9:21688288-21688299	+	TTTTTCTTTGCG	-241	4.65e-06	0.6746	peptide methionine sulfoxide reductase
ZmIDD5	GRMZM2G465835	FunTFBS	6:149592985-149592996	+	TTTCCTTTCTCG	-225	8.67e-06	0.5865	putative NAC domain-containing protein 61
ZmIDD9	AC190883.2_FG005	FunTFBS	3:200267024-200267043	-	TAGTTAACGACAAAAATAAA	-387	3.04e-08	0.5989
ZmIDD9	AC203253.4_FG001	FunTFBS	3:151635785-151635804	+	CATTAAATGACAAAAAACAC	-360	2.54e-06	0.668
ZmIDD9	GRMZM2G004259	FunTFBS	1:21455733-21455752	+	TTTAAAATGACAAAATTTTA	-328	7.19e-06	0.5566	uncharacterized LOC100282391
ZmIDD9	GRMZM2G017186	FunTFBS	1:276389829-276389848	+	AACAAGAAGACAACATTGTA	41	6.23e-06	0.5729	uncharacterized LOC541703
ZmIDD9	GRMZM2G027049	FunTFBS	2:24336809-24336828	-	ACGAATAAGACAAAACAAAG	38	8.12e-07	0.5214	WD repeat-containing protein 44
ZmIDD9	GRMZM2G043117	FunTFBS	8:146281035-146281054	-	TGAAATAAGACAAATAGTCA	-256	5.97e-06	0.5478	plant-specific domain TIGR01570 family protein
ZmIDD9	GRMZM2G045706	FunTFBS	2:167841960-167841979	-	TCGAATAAGACAAGAATAAG	-256	7.88e-06	0.5656	thiol protease SEN102
ZmIDD9	GRMZM2G064537	FunTFBS	4:176377593-176377612	+	GGAAAAAAGACAAAAATTCG	-63	6.7e-07	0.5186	chaperone protein DnaJ
ZmIDD9	GRMZM2G087103	FunTFBS	3:1482927-1482946	+	CCCCAAACGACAAAAGAAGC	-30	3.9e-06	0.536	uncharacterized LOC100192017
ZmIDD9	GRMZM2G094388	FunTFBS	1:45446331-45446350	+	TATAAAATGACAAACATAGT	-190	7.39e-06	0.5049	ran-binding protein 1
ZmIDD9	GRMZM2G097662	FunTFBS	10:106862724-106862743	+	AGGAAGAAGACAAATTTTTT	59	3.63e-06	0.5316	uncharacterized LOC100280214
ZmIDD9	GRMZM2G134886	FunTFBS	9:126574699-126574718	+	ATCAATAAGACAAAAATCAA	-413	7.89e-07	0.7341
ZmIDD9	GRMZM2G140924	FunTFBS	10:140501470-140501489	+	GAAAAGCAGACAAAAAAAAA	-307	1.47e-06	0.6192	zinc finger, C3HC4 type family protein
ZmIDD9	GRMZM2G141320	FunTFBS	1:187704233-187704252	-	AGGTTACCGACAAAAACGTT	-411	9.55e-06	0.6764	Monogalactosyldiacylglycerol synthase 2 chloroplastic
ZmIDD9	GRMZM2G144282	FunTFBS	5:71751173-71751192	+	AATATAACGACAAAGATAAA	-171	6.37e-07	0.8526	eukaryotic translation initiation factor 3 subunit 1 alpha, 35kDa
ZmIDD9	GRMZM2G164527	FunTFBS	1:19636531-19636550	+	ATGCAAGAGACAAAAAAAAA	-65	7.45e-06	0.5337	ras-related protein Rab11D
ZmIDD9	GRMZM2G329999	FunTFBS	5:56940229-56940248	-	AAATTAATGACAAAAAAAAT	-135	1.8e-06	0.5453
ZmIDD9	GRMZM2G335685	FunTFBS	5:197831150-197831169	-	AGCCAACAGACAAAAAAAAA	-258	2.87e-06	0.6557	uncharacterized LOC100279084
ZmIDD9	GRMZM2G379608	FunTFBS	6:116852109-116852128	+	AAAATAAAGACGAAAACTAC	-250	8.68e-06	0.7761	uncharacterized LOC100280252
ZmIDD9	GRMZM2G392116	FunTFBS	10:147291952-147291971	-	AATAATCGGACAAAAAAAGG	-126	7.19e-06	0.6717	uncharacterized LOC100280252
ZmIDD9	GRMZM2G426275	FunTFBS	10:109387985-109388004	+	AATAAAAAGACAAGTTTTAT	-126	9.68e-06	0.6804	uncharacterized LOC100274447
ZmIDD9	GRMZM2G444560	FunTFBS	2:233141885-233141904	-	ATTCAAAAGACAAAAAAGAA	-277	2.46e-06	0.5118	AAA-ATPase ASD mitochondrial
ZmIDD9	GRMZM5G857708	FunTFBS	9:147332928-147332947	-	GTGAACAAGACAAAAACACA	-29	6.23e-06	0.5184	DExH-box ATP-dependent RNA helicase DExH14
ZmIDD10	AC190883.2_FG005	FunTFBS	3:200267026-200267043	-	TAGTTAACGACAAAAATA	-387	9.23e-08	0.5821
ZmIDD10	AC203253.4_FG001	FunTFBS	3:151635785-151635802	+	CATTAAATGACAAAAAAC	-360	1.13e-06	0.6437
ZmIDD10	GRMZM2G017186	FunTFBS	1:276389829-276389846	+	AACAAGAAGACAACATTG	41	6.47e-06	0.549	uncharacterized LOC541703
ZmIDD10	GRMZM2G022283	FunTFBS	10:37545880-37545897	-	AGGAAGAGGACAAATGGA	40	9.27e-06	0.5087	adenylylsulfatase HINT3
ZmIDD10	GRMZM2G023591	FunTFBS	1:182129090-182129107	+	TACAAAAAGACAAAACGG	-58	3.15e-07	0.5128	uncharacterized LOC100283883
ZmIDD10	GRMZM2G027049	FunTFBS	2:24336811-24336828	-	ACGAATAAGACAAAACAA	38	5.82e-06	0.5477	WD repeat-containing protein 44
ZmIDD10	GRMZM2G028637	FunTFBS	3:10095601-10095618	+	CTCAAAACGCCAAAAATT	68	4.76e-06	0.5025	uncharacterized LOC100273799
ZmIDD10	GRMZM2G041350	FunTFBS	10:88630243-88630260	+	AAAAAGAAGACAAAAAGG	-95	7.53e-07	0.5549
ZmIDD10	GRMZM2G057369	FunTFBS	6:163209275-163209292	-	AGATATAAGACAAAACAA	-401	5.07e-06	0.522	uncharacterized LOC100283736
ZmIDD10	GRMZM2G064537	FunTFBS	4:176377593-176377610	+	GGAAAAAAGACAAAAATT	-65	5.38e-07	0.5917	chaperone protein DnaJ
ZmIDD10	GRMZM2G079908	FunTFBS	10:76415759-76415776	-	AGGAAAAGGACAAAATTA	-129	1.4e-07	0.5868	acyl-CoA-binding protein
ZmIDD10	GRMZM2G087103	FunTFBS	3:1482927-1482944	+	CCCCAAACGACAAAAGAA	-30	9.2e-06	0.5062	LOC100192017 uncharacterized LOC100192017
ZmIDD10	GRMZM2G094388	FunTFBS	1:45446331-45446348	+	TATAAAATGACAAACATA	-190	6.09e-06	0.5943	ran-binding protein 1
ZmIDD10	GRMZM2G097662	FunTFBS	10:106862724-106862741	+	AGGAAGAAGACAAATTTT	61	2.52e-06	0.5979	uncharacterized LOC100280214
ZmIDD10	GRMZM2G108149	FunTFBS	9:101890190-101890207	+	CAGAAAACGACAATGCAG	-148	8.38e-06	0.6748	uncharacterized LOC100273873
ZmIDD10	GRMZM2G134886	FunTFBS	9:126574699-126574716	+	ATCAATAAGACAAAAATC	-413	6.92e-06	0.8672
ZmIDD10	GRMZM2G140924	FunTFBS	10:140501470-140501487	+	GAAAAGCAGACAAAAAAA	-309	4.2e-06	0.5946	zinc finger, C3HC4 type family protein
ZmIDD10	GRMZM2G141320	FunTFBS	1:187704235-187704252	-	AGGTTACCGACAAAAACG	-413	6.18e-06	0.9259	Monogalactosyldiacylglycerol synthase 2 chloroplastic
ZmIDD10	GRMZM2G141873	FunTFBS	8:133476797-133476814	+	ATTAAAACGACAAAGAGT	-186	8.5e-06	0.5059	Pectin acetylesterase 5
ZmIDD10	GRMZM2G144282	FunTFBS	5:71751173-71751190	+	AATATAACGACAAAGATA	-171	7.91e-07	0.8548	eukaryotic translation initiation factor 3 subunit 1 alpha, 35kDa
ZmIDD10	GRMZM2G150386	FunTFBS	1:297391177-297391194	-	GAGTAAACAACAAAAATA	-266	8.88e-06	0.6437
ZmIDD10	GRMZM2G180947	FunTFBS	2:211052376-211052393	-	GGAAAACAGACAAAACAA	-273	5.86e-06	0.5977	nuclear transcription factor Y subunit B-10
ZmIDD10	GRMZM2G329999	FunTFBS	5:56940231-56940248	-	AAATTAATGACAAAAAAA	-135	2.22e-06	0.7171
ZmIDD10	GRMZM2G337143	FunTFBS	10:88630243-88630260	+	AAAAAGAAGACAAAAAGG	-312	7.53e-07	0.5549	uncharacterized LOC100280384
ZmIDD10	GRMZM2G392116	FunTFBS	10:147291954-147291971	-	AATAATCGGACAAAAAAA	-128	9.47e-06	0.7276	uncharacterized LOC100280252
ZmIDD10	GRMZM2G426275	FunTFBS	10:109387985-109388002	+	AATAAAAAGACAAGTTTT	-128	8.81e-06	0.6794	uncharacterized LOC100274447
ZmIDD10	GRMZM5G827218	FunTFBS	1:211450533-211450550	-	CAAAACACGACAAACCTC	10	4.72e-06	0.5549
ZmIDD13	AC190883.2_FG005	FunTFBS	3:200267029-200267043	-	TAGTTAACGACAAAA	-387	3.67e-07	0.5223
ZmIDD13	AC195058.3_FG003	FunTFBS	10:79550779-79550793	-	CATTAAAAGACAAGT	-441	7.97e-06	0.5309
ZmIDD13	AC206165.3_FG009	FunTFBS	6:159828201-159828215	-	TACAAAAAGAAAAAA	-435	9.73e-07	0.5207
ZmIDD13	AC217050.4_FG004	FunTFBS	1:214832792-214832806	-	TTTAAAAAGACAAAA	-402	3.95e-06	0.6342
ZmIDD13	AC234203.1_FG011	FunTFBS	1:188104850-188104864	-	TAGAAGAAGAAAAAA	-399	2.65e-06	0.5468
ZmIDD13	GRMZM2G005229	FunTFBS	5:182061234-182061248	+	TTATAAAAGACAAAA	-17	9.5e-06	0.5208
ZmIDD13	GRMZM2G017941	FunTFBS	2:150652452-150652466	+	TGCGAAAAGACAAAA	-330	2.27e-06	0.5456	uncharacterized LOC100276806
ZmIDD13	GRMZM2G027049	FunTFBS	2:24336814-24336828	-	ACGAATAAGACAAAA	38	7.23e-06	0.5236	WD repeat-containing protein 44
ZmIDD13	GRMZM2G043275	FunTFBS	7:19593965-19593979	+	AAGAAAAAGAAAAGA	0	9.85e-06	0.5591	nudix hydrolase 13
ZmIDD13	GRMZM2G053934	FunTFBS	4:224578931-224578945	-	AAATAAAAAACAAAA	-215	8.25e-06	0.5469	AAA-type ATPase family protein / ankyrin repeat family protein
ZmIDD13	GRMZM2G055320	FunTFBS	9:107809932-107809946	+	AAGTACACGACACAT	-271	5.85e-06	0.5597	uncharacterized LOC100382272
ZmIDD13	GRMZM2G056019	FunTFBS	2:164817007-164817021	+	AACAAAACAAAAAAA	-175	7.11e-06	0.6885
ZmIDD13	GRMZM2G057067	FunTFBS	3:199380387-199380401	+	CGCGAAAAGACAAAA	-166	1.63e-06	0.5996	uncharacterized LOC100283620
ZmIDD13	GRMZM2G057369	FunTFBS	6:163209278-163209292	-	AGATATAAGACAAAA	-401	8.29e-06	0.6912	uncharacterized LOC100283736
ZmIDD13	GRMZM2G064537	FunTFBS	4:176377593-176377607	+	GGAAAAAAGACAAAA	-68	4.04e-06	0.5413	chaperone protein DnaJ
ZmIDD13	GRMZM2G069856	FunTFBS	2:61297356-61297370	+	CATAAAAAGAAAAAT	-446	4.68e-06	0.5262	uncharacterized LOC100382237
ZmIDD13	GRMZM2G079908	FunTFBS	10:76415762-76415776	-	AGGAAAAGGACAAAA	-129	8.52e-07	0.5885	acyl-CoA-binding protein
ZmIDD13	GRMZM2G087103	FunTFBS	3:1482927-1482941	+	CCCCAAACGACAAAA	-30	4.35e-06	0.7308	LOC100192017 uncharacterized LOC100192017
ZmIDD13	GRMZM2G093346	FunTFBS	6:162105200-162105214	+	AGAAAAAAGAAAAAA	-410	5.58e-06	0.6489	APx1 - Cytosolic Ascorbate Peroxidase,G-type lectin S-receptor-like serine/threonine-protein kinase pseudogene
ZmIDD13	GRMZM2G093622	FunTFBS	4:28443656-28443670	+	CACAAAAAGAAAAGA	42	7.63e-06	0.6425	putative germin-like protein 12-4
ZmIDD13	GRMZM2G097662	FunTFBS	10:106862724-106862738	+	AGGAAGAAGACAAAT	64	2.07e-06	0.588	uncharacterized LOC100280214
ZmIDD13	GRMZM2G103013	FunTFBS	4:205985348-205985362	+	AAGAAAAAGAAAAAA	-7	9.73e-07	0.5597	uncharacterized LOC100277850
ZmIDD13	GRMZM2G108859	FunTFBS	1:178018869-178018883	+	CATAAACAGACAAAC	-385	9.53e-06	0.6879	protein SMAX1-LIKE 4
ZmIDD13	GRMZM2G149372	FunTFBS	6:143136905-143136919	-	ATGAAAAAGACAAAT	-374	8.21e-06	0.6475	inositol polyphosphate multikinase IPK2
ZmIDD13	GRMZM2G150386	FunTFBS	1:297391180-297391194	-	GAGTAAACAACAAAA	-266	7.48e-06	0.7869
ZmIDD13	GRMZM2G168431	FunTFBS	4:164026381-164026395	+	TAAAAAAAAACAAAA	-362	6.11e-06	0.5541	aspartyl protease family protein
ZmIDD13	GRMZM2G359779	FunTFBS	2:80966202-80966216	-	CATAAACAGACAAAC	-388	9.53e-06	0.7432	protein SMAX1-LIKE 4
ZmIDD13	GRMZM2G416625	FunTFBS	7:128412341-128412355	-	CAAAAAAAGAAAAAT	-243	8.13e-06	0.6114	purine permease 3
ZmIDD13	GRMZM2G423567	FunTFBS	7:137585926-137585940	-	CAAAAAAAGAAAAAA	-101	2.37e-06	0.8085	type I inositol polyphosphate 5-phosphatase 13
ZmIDD13	GRMZM2G426275	FunTFBS	10:109387985-109387999	+	AATAAAAAGACAAGT	-131	7.39e-06	0.6946	uncharacterized LOC100274447
ZmIDD13	GRMZM2G428168	FunTFBS	3:149353736-149353750	-	AACAAAACAAAAAAA	-15	7.11e-06	0.6045	glutathione S-transferase GST 21
ZmIDD13	GRMZM2G428233	FunTFBS	5:198091376-198091390	+	TAAGAAACGACAAAT	-453	6.04e-06	0.525	VAN3-binding protein
ZmIDD13	GRMZM2G443903	FunTFBS	2:5011107-5011121	-	CCGAAGACGACAAGA	-204	6.83e-06	0.6541	Alpha-N-acetylglucosaminidase
ZmIDD13	GRMZM2G532534	FunTFBS	9:152533066-152533080	-	TCCTAAAAGAAAAAA	2	9.15e-06	0.5927	GATA transcription factor 4
ZmIDD13	GRMZM2G561273	FunTFBS	5:199031764-199031778	+	AAAAAAAAGACAAAA	-197	2.55e-07	0.6734
ZmIDD13	GRMZM5G824062	FunTFBS	5:76463252-76463266	-	AACAACACAACAAAA	-413	4.6e-06	0.5339
ZmIDD13	GRMZM5G827218	FunTFBS	1:211450536-211450550	-	CAAAACACGACAAAC	10	3.25e-06	0.5209
ZmIDD13	GRMZM5G883149	FunTFBS	8:116390288-116390302	-	AGCAATAAGACAAAA	-298	2.03e-06	0.5857	uncharacterized LOC100274110
ZmIDD13	GRMZM5G898305	FunTFBS	7:161740783-161740797	+	ATAAAAAAGACAAAA	-285	6.76e-06	0.5516	uncharacterized LOC100282860

[truncated: 3 more sheets: S11, S12, S13]
